# 1 Time course of EEG power during creative problem- 2 solving with insight or remote thinking

3  
4  
5 Théophile Bieth<sup>1,2</sup>, Marcela Ovando-Tellez<sup>1</sup>, Alizée Lopez-Persem<sup>1</sup>, Beatrice Garcin<sup>1,3</sup>, Laurent  
6 Hugueville<sup>1</sup>, Katia Lehongre<sup>1</sup>, Richard Levy<sup>1,2</sup>, Nathalie George<sup>1,4\*</sup>, Emmanuelle Volle<sup>1\*</sup>

## 7 8 9 **Affiliations:**

10 1: Sorbonne Université, Institut du Cerveau - Paris Brain Institute - ICM, Inserm, CNRS, APHP,  
11 Hôpital de la Pitié Salpêtrière, Paris, France

12 2: Sorbonne Université, Institut du Cerveau - Paris Brain Institute - ICM, Inserm, CNRS, AP-HP,  
13 Hôpital de la Pitié Salpêtrière, DMU Neurosciences, Paris, France

14 3: Neurology Department, Avicenne Hospital, AP-HP, Bobigny, France

15 4: Institut du Cerveau - ICM, Inserm U1127, CNRS UMR7225, Sorbonne Université, Centre  
16 MEG-EEG, CENIR, 75013, Paris, France.

17  
18  
19 \*Equal contributors

## 20 **Corresponding authors:**

21 Emmanuelle Volle : [emmavolle@gmail.com](mailto:emmavolle@gmail.com)

22 Théophile Bieth: [theo\\_bieth@hotmail.fr](mailto:theo_bieth@hotmail.fr)

## 23 **Keywords:**

24  
25 Creativity, Eurêka, Aha moment, insight problem-solving, semantic distance, EEG, time-  
26 frequency  
27  
28

29 **Abstract**

30

31 Problem-solving often requires creativity and is critical in everyday life. However, the  
32 neurocognitive mechanisms underlying creative problem-solving remain poorly understood.  
33 Two mechanisms have been highlighted: forming new connections from and between the  
34 problem elements and *insight solving* (with a sudden realization of a solution). We examined  
35 EEG activity during an adapted version of a classical insight problem task, the Remote  
36 Associates Test, that requires finding a word connecting three words. It allowed us to explore  
37 *remoteness in semantic connections* (by varying the remoteness of the solution word across  
38 trials) and *insight solving* (identified as a "Eurêka" moment reported by the participants).  
39 *Semantic remoteness* was associated with a power increase in alpha band (8-12Hz) in a left  
40 parieto-temporal cluster, beta band (13-30Hz) in a right fronto-temporal cluster in the early  
41 phase of the task, and theta band (3-7Hz) in frontal cluster before the participants responded.  
42 *Insight solving* was associated with power increase preceding the response in alpha and  
43 gamma band (31-60Hz) in left temporal clusters and theta band in a frontal cluster. Source  
44 reconstructions show the brain regions associated with these clusters. Overall, our findings  
45 shed new light on the dynamic of some of the mechanisms involved in creative problem-  
46 solving.

## 47 Introduction

48

49 Solving problems can be a societal challenge, an opportunity for progress, or a personal  
50 concern. We constantly have to find solutions to new problems and adapt ourselves to new  
51 situations, from the everyday life (e.g., how to reorganize my workspace at home), to  
52 worldwide concerns (e.g., how to avoid global warming). Problem-solving requires creativity  
53 (called here creative problem-solving) when there is no obvious or previously established rule  
54 to solve a newly encountered problem or when the heuristics or rules that we spontaneously  
55 use are inefficient or lead to an impasse. In creative problem-solving, we need to change our  
56 mental representation of the problem by recombining the elements of the problem in new  
57 ways or finding new connections between seemingly unrelated elements. In some cases, the  
58 solution comes to mind suddenly and spontaneously, with a "Eurêka" phenomenon  
59 (Topolinski & Reber, 2010). This problem-solving type is usually considered insight solving  
60 (Weisberg, 2013; Kounios & Beeman, 2014). It relates to the illumination phase of the creative  
61 process model developed from the reports of eminent scientific discoveries or artistic  
62 creations (Wallas, 1926). Combining remote elements and insight solving are considered as  
63 central aspects of creative thinking but the underlying neurocognitive mechanisms are still  
64 poorly understood. Are these two aspects related? What happens in the brain when solving a  
65 problem requires combining remote concepts or elicits a "Eurêka" experience? Here, we  
66 explore these questions using EEG during a problem-solving task assessing creative abilities.

67 Combining remote elements is a core component of the associative theory of creativity  
68 proposed by Mednick (Mednick, 1962). According to his approach, creativity relies on the  
69 ability to form new combinations from unusual associations. Mednick's theory was  
70 operationalized in the Remote Associates Test (RAT) that consists in finding a word connecting  
71 three given unrelated cue words (Mednick, 1962). The RAT is a creative problem-solving task:  
72 it requires forming a new combination of distant elements of knowledge, and it often elicits  
73 an experience of insight or "Eurêka" in participants (Bowden et al., 2005; Topolinski & Reber,  
74 2010; Kounios & Beeman, 2014). Several versions of the RAT have been developed using  
75 lexical (compound words) (Bowden & Jung-Beeman, 2003) or semantic associations between  
76 the cue words and the solution (Oltețeanu et al., 2019), or using pictures instead of words  
77 (Oltețeanu & Zunjani, 2020; Becker & Cabeza, 2021). Our lab developed a semantic associative  
78 version of the task (the Combined Associates Task, CAT) (Bendetowicz et al., 2017, 2018) in  
79 which we controlled the semantic association strength (SAS) between the expected solution  
80 and the three cue words. The CAT allows us to test Mednick's hypothesis, according to which  
81 the more remote the elements to be combined, the more creative the process (Mednick,  
82 1962).

83 A previous lesion study identified two distinct brain regions and networks as critical to  
84 CAT-solving when remoteness increases (Bendetowicz et al., 2018). First, the medial  
85 prefrontal cortex (PFC) as part of the default mode network, a network related to spontaneous  
86 cognition and associative thinking (Andrews-Hanna et al., 2010, 2014), was critical for the  
87 spontaneous generation of remote associates. Second, the rostro-lateral part of the PFC  
88 involved in the executive control network (Yeo et al., 2011; Power & Petersen, 2013) was  
89 critical for combining remote associates. These results are consistent with the associative  
90 theory of creativity but also emphasizes the importance of controlled processes during CAT-  
91 solving (Jones & Estes, 2015). They converge with findings from functional connectivity on  
92 divergent thinking in healthy subjects (Beaty et al., 2016), extend them to convergent thinking  
93 tasks (CAT), and demonstrate the necessity of both networks. Hence, their findings offer new

94 light on the neural correlates of combining remote associates, while most previous  
95 neurocognitive studies that used RAT-like tasks focused on the insight phenomenon (Wu et  
96 al., 2020).

97 RAT-like tasks are helpful to explore insight solving because they provide multiple short  
98 trials, allowing to compare trials with and without insight, and better fit the constraints of  
99 neuroimaging studies than other insight problem-solving tasks (e.g., riddles). Currently, the  
100 subjective report of Eureka experience during problem-solving, on a trial-by-trial basis, is the  
101 most common measure used to study insight (Laukkonen & Tangen, 2018). The Eurêka  
102 corresponds to the subjective experience that arises when the solution comes to mind  
103 suddenly and effortlessly, without being able to report the mental steps leading to it.  
104 According to some insight theories (Sprugnoli et al., 2017), the Eurêka moment may follow an  
105 initial failure to solve the problem due to reaching a mental impasse and overcoming it with a  
106 reorganization of the problem representation (Ohlsson, 1992).

107 The critical question of the neural underpinnings of insight problem-solving remains  
108 unanswered. A few studies explored the brain correlates of insight problem-solving using  
109 functional MRI and reported the involvement of frontal regions (anterior and posterior  
110 cingulate cortex, inferior frontal gyrus), temporal regions (temporo-polar region, superior and  
111 middle temporal gyri, hippocampus) and the insula, during RAT-like tasks (Luo & Niki, 2003;  
112 Jung-Beeman et al., 2004; Anderson et al., 2009; Subramaniam et al., 2009; Aberg et al., 2016;  
113 Tik et al., 2018; Becker et al., 2020) or other insight tasks (Aziz-Zadeh et al., 2009; Dietrich &  
114 Kanso, 2010; Qiu et al., 2010; Shen et al., 2016; Lin et al., 2018). Electrophysiological methods  
115 such as EEG provide invaluable information on the time course of information processing and  
116 brain dynamics associated with cognitive processes. They thus have the potential to capture  
117 the suddenness of Eurêka experience (Jung-Beeman et al., 2004; Sandkühler & Bhattacharya,  
118 2008). A pioneering study reported that RAT trials solved with Eurêka (compared to trials  
119 without Eurêka) were associated with a power increase in the alpha band in the right parieto-  
120 occipital areas around 1.5s before the subject's response, followed by a gamma burst in the  
121 right antero-superior temporal lobe 0.3s before the subject's response (Jung-Beeman et al.,  
122 2004). Alpha and gamma oscillations have been associated with insight solving in other studies  
123 that used the RAT (Sandkühler & Bhattacharya, 2008; Luft et al., 2018) and other paradigms  
124 (Sheth et al., 2009; Rosen & Reiner, 2016; Oh et al., 2020). Independently of insight solving,  
125 two studies reported a power increase in theta band in prefrontal electrodes and beta band  
126 in fronto-temporal electrodes when contrasting RAT-solving with a simple word generation  
127 task (Razumnikova, 2007) or a category fluency task (Danko et al., 2009).

128 Overall, the few existing neuroimaging studies of creative problem-solving focused  
129 mainly on insight, and none of them explored the effect of the remoteness of the elements to  
130 be combined. In addition, most EEG studies restricted their analyses to specific frequency  
131 bands or groups of electrodes. Hence, previous studies do not draw homogeneous conclusions  
132 on the brain mechanisms involved in creative problem-solving, including in RAT-like tasks.  
133 Here, we aim to better understand the neurocognitive mechanisms of creative problem-  
134 solving by jointly exploring the EEG correlates of the effects of *associative remoteness* and  
135 *insight solving*. For this purpose, we used the CAT (Bendetowicz et al., 2017, 2018), where the  
136 *remoteness* of the solution word varies across trials, and *insight* was explored by collecting  
137 subjective reports of Eurêka on a trial-by-trial basis. Since EEG data using the RAT are  
138 heterogeneous in the literature (Dietrich & Kanso, 2010) and the effect of *semantic*  
139 *remoteness* has not been investigated, we used an exploratory approach with no spatial,

140 temporal, or frequency a priori. We hypothesized that the effects of *remoteness* and *insight*  
141 *solving* are associated with distinct brain EEG activities in space and time.

142

## 143 Results

144

### 145 Behavioral data

146

147 We recorded the EEG activity of 23 participants performing the CAT (100 trials). On each trial,  
148 participants had up to 30s to find a word that connects three unrelated words. Then they  
149 reported if they solved the trial with a Eurêka (**Figure 1**; see *method*). Each trial was  
150 characterized by a semantic association strength (*SAS*) value (a continuous variable  
151 determined by the material and fixed between subjects) and categorized according to how  
152 the subject solved it (with or without Eurêka; binary variable that depends on each subject).

153

154

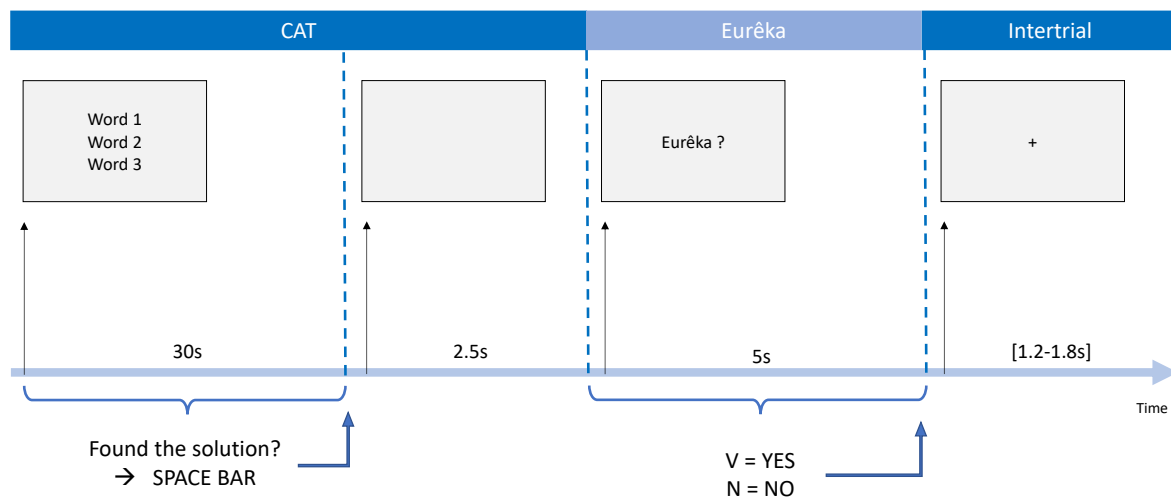

155

156

157 **Figure 1. Summary of the CAT procedure.** Experimental design of the CAT. Each trial starts  
158 with the presentation of three unrelated words, vertically displayed on a grey screen for up to  
159 30s. The participants press the space bar as soon as they think they have the solution,  
160 triggering the display of a blank screen during 2.5s. They verbalize their response during this  
161 period. Then, the question "Eurêka?" is displayed on the screen, and the participants indicate  
162 whether the solution that they just gave came to their mind with a Eurêka, using the keyboard  
163 letters "V" (yes) and "N" (no), within a time limit of 5s. Finally, a fixation cross is displayed on  
164 the screen for a random time before beginning a new trial (intertrial interval ranges between  
165 1.2 and 1.8s).

166

167

168 Overall, mean accuracy across individuals was 57.4% (SD=12.0), and mean RT was 8.4s  
169 (SD=1.0).

170

171 Across trials, the percentage of participants who gave a correct response correlated  
172 significantly positively with *SAS* (**Figure 2A**,  $\rho=0.48$ ,  $p=3.85 \cdot 10^{-7}$ ), indicating that the closer  
173 the solution was, the more individuals found it. The correlation between the mean RT for  
174 correct responses across trial and *SAS* was negative and marginally significant (**Figure 2B**,  $\rho=-$   
0.20,  $p=0.051$ ).

175 On average, the participants reported a Eurêka in 55.6% (SD=20) of correct trials (and  
 176 in 22.7% (SD=16.4) of incorrect trials), whereas they declared no Eurêka in 44.1% (SD=21.1) of  
 177 correct trials (and in 49.1% (SD=20.5) of incorrect trials). Within correct trials, the percentages  
 178 of Eurêka and no Eurêka did not statistically differ ( $W=149$ ,  $p=0.26$ ; **Figure 2C**). However, mean  
 179 RT in trials correctly solved with Eurêka were significantly shorter than mean RT in trials solved  
 180 without Eurêka (respectively, 6.8s (SD=2.1) and 11.4s (SD=3.8),  $W=15$ ,  $p=1.30 \cdot 10^{-3}$ , **Figure 2D**).  
 181  
 182

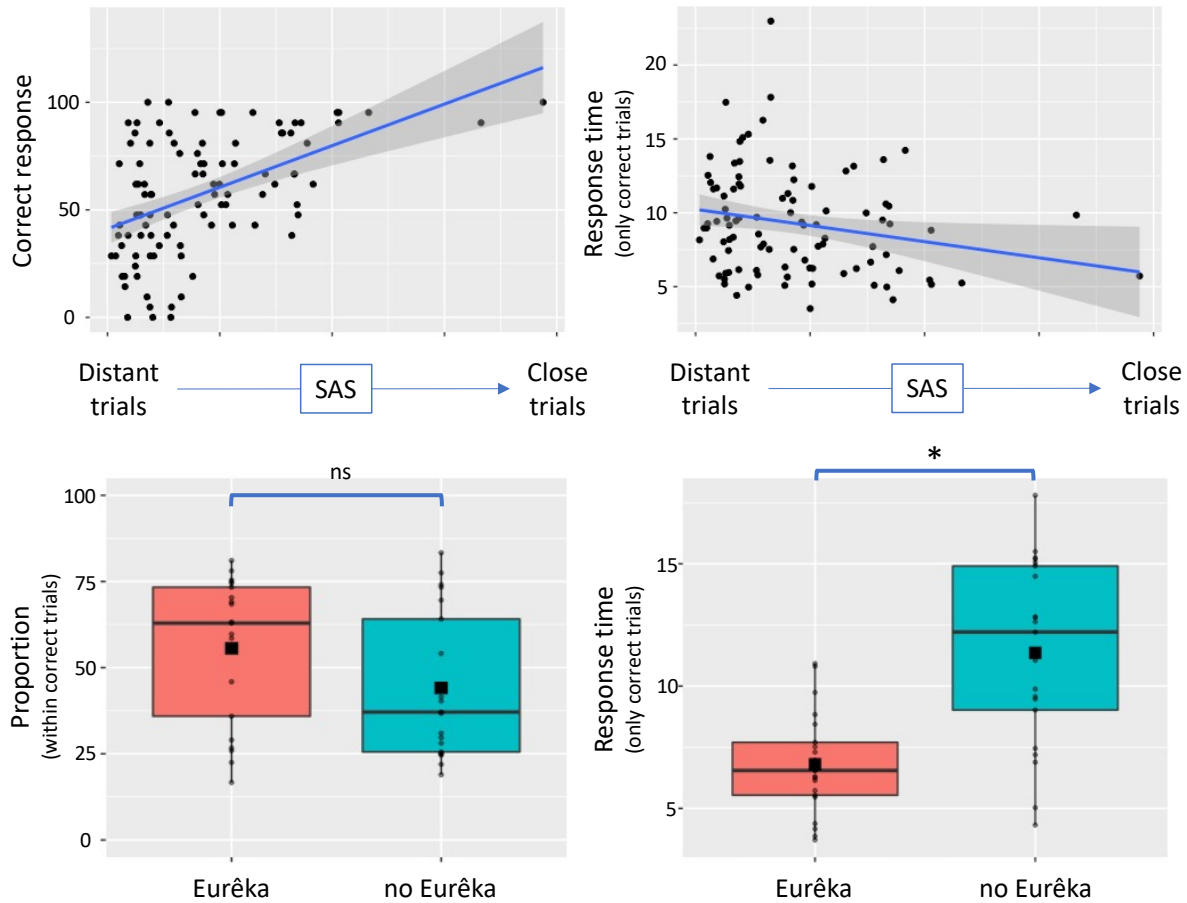

183  
 184  
 185 **Figure 2. Behavioral results. A.** Percentage of participants with correct responses per trial as  
 186 a function of SAS. Each dot represents a trial, and the blue line represents the regression line  
 187 between the two variables ( $\rho=0.48$ ,  $p=3.85 \cdot 10^{-7}$ ). **B.** Averaged RT per trial as a function of  
 188 SAS. Each dot represents a trial, and the blue line represents the regression line between the  
 189 two variables ( $\rho=-0.20$ ,  $p=0.051$ ). **C.** Percentage of Eurêka (in red) and no Eurêka (in blue)  
 190 within the correct trials. Each dot represents a subject, color boxes represent the upper and  
 191 lower quartiles, the black horizontal line within the boxes symbolizes the median, and the  
 192 filled square is the mean value across subjects. **D.** Averaged RT of correct trials with Eurêka (in  
 193 red) and without Eurêka (in blue). Same legend as in **C**. ns: non-significant, \*:  $p<0.05$ .  
 194  
 195

196 We examined how *semantic remoteness* related to Eurêka reports by computing  
 197 logistic regressions at the individual level (see method). The results show no significant effect  
 198 of SAS (orthogonalized from RT) on Eurêka reports in any individual (**Figure S1A**). At the group

199 level, the one-sample t-test of the individual regression coefficients was not significant  
200 (mean=0.004, SD=0.01,  $t(20)<1$ ,  $p=0.70$ ; **Figure S1B**).

201

202

203 EEG

204

205 Time-frequency analyses were computed between 3 and 60Hz during the 2s period following  
206 the onset of the word triplet (initial time window) and the 2s period preceding the  
207 participant's response (response time window; see method). Time-frequency maps were  
208 averaged along the frequency dimension according to four frequency bands (i.e., theta 3-7 Hz,  
209 alpha 8-12 Hz, beta 13-30 Hz, and gamma 31-60 Hz).

210 The average number of trials included in the EEG analyses (non-artifacted correct trials  
211 with  $RT>4s$ ) for the initial and response time windows was, respectively, 32.1 (SD=11.5) and  
212 32 trials (SD=11.7) for *semantic remoteness* condition, and 30.3 (SD=12) and 29.4 trials  
213 (SD=11) for the in *insight solving* condition. The time-frequency maps of EEG power across all  
214 trials are shown in **Figure S2** for each time window of interest, including topographical maps  
215 for each frequency band.

216 To explore the neurophysiological correlate of *semantic remoteness* and *insight*  
217 *solving*, we used a two-level statistical analysis approach. First, individual linear regressions  
218 assessed the relation between EEG power in each frequency band and behavior with EEG  
219 power as the dependent variable and i) semantic distance as the independent variable to  
220 explore the effect of *semantic remoteness*, ii) *Eurêka* self-report as the independent variable  
221 to explore *insight solving*. Then the resulting individual regression coefficients were tested at  
222 the group level (one-sample t-tests) with cluster-based corrections for multiple comparisons  
223 in spatial (65 electrodes) and time dimensions. These analyses were performed for each time  
224 window (see method).

225 Finally, we used source localization to explore the brain regions associated with the  
226 significant clusters observed at the sensor level. For this, we analyzed the cortical sources in  
227 the time windows and the frequency bands in which significant clusters were found.

228

229

230 *Semantic remoteness in associative combination*

231

232 We found three significant negative clusters (i.e., the lower the SAS, i.e., the more remote the  
233 solution, the higher the power in the considered frequency band) (**Figure 3**). No positive  
234 clusters were found.

235 Two significant clusters were observed during the initial time period. A first negative  
236 cluster was observed in the alpha band on left temporal and parietal electrodes, from 1.29 to  
237 1.99s after the onset of the cue words (11 electrodes,  $\text{sum}(t)=-1523$ ,  $p_{\text{corr}}=5.99 \cdot 10^{-3}$ ) (**Figure 3**,  
238 "alpha" in orange). We performed a source reconstruction of alpha band activity during the  
239 cluster time window and contrasted the cortical source maps between distant and close trials.  
240 The largest source differences in alpha band between 1.29 and 1.99s were located in the left  
241 inferior temporal gyrus and the left anterior part of the middle temporal gyrus. We also  
242 observed source differences in alpha band activity in the right hemisphere in the anterior part  
243 of the inferior and middle temporal gyrus and the right pre- and post-central gyrus (**Figure**  
244 **S3A**).

245 A second negative cluster was observed in the beta band during the initial time  
246 window. It was formed from two subsets of electrodes over time. Beta activity increased with  
247 *remoteness* first on central electrodes from 1.47 to 1.70s after the cue words onset (6  
248 electrodes,  $\text{sum}(t)=-421$ ,  $p_{\text{corr}}=0.03$ ) (**Figure 3**, "beta" in light green) and second on temporo-  
249 frontal electrodes from 1.78 to 1.99s (7 electrodes,  $\text{sum}(t)=-554$ ,  $p_{\text{corr}}=0.02$ ) (**Figure 3**, "beta"  
250 in dark green). We performed source reconstruction in the beta band during these two time  
251 periods separately. Between 1.47 and 1.70 s, the distant versus close contrast revealed  
252 sources located in bilateral posterior middle temporal gyrus. In addition, there was reduced  
253 beta activity for distant than close trials in the left anterior part of the middle frontal gyrus  
254 (**Figure S3B**). Between 1.78 and 1.99s, the sources showing differentiated beta band activity  
255 for remote versus close trials were located in similar regions (**Figure S3C**): beta power was  
256 higher in distant than close trials in a potential source located in the left posterior inferior  
257 temporal gyrus and was lower in the left posterior and inferior gyrus encompassing the left  
258 inferior frontal sulcus.

259 The third negative cluster was observed in the theta band during the response time  
260 window (-1.80 to -1.06s before the response) on prefrontal electrodes (15 electrodes,  
261  $\text{sum}(t)=-2574$ ,  $p_{\text{corr}}=2.00 \cdot 10^{-3}$ ) (**Figure 3**, "theta" in yellow). As for the previous clusters, we  
262 reconstructed the sources of theta band activity in the cluster time period. Contrasting distant  
263 versus close trials revealed sources located in the right inferior part of pre- and post-central  
264 gyrus and in several regions in the left hemisphere, including the lateral part of the orbital  
265 gyrus and the anterior part of the inferior frontal gyrus, the inferior pre- and post-central  
266 gyrus, the posterior part of the superior temporal gyrus and posterior and anterior temporal  
267 areas (**Figure S3D**).



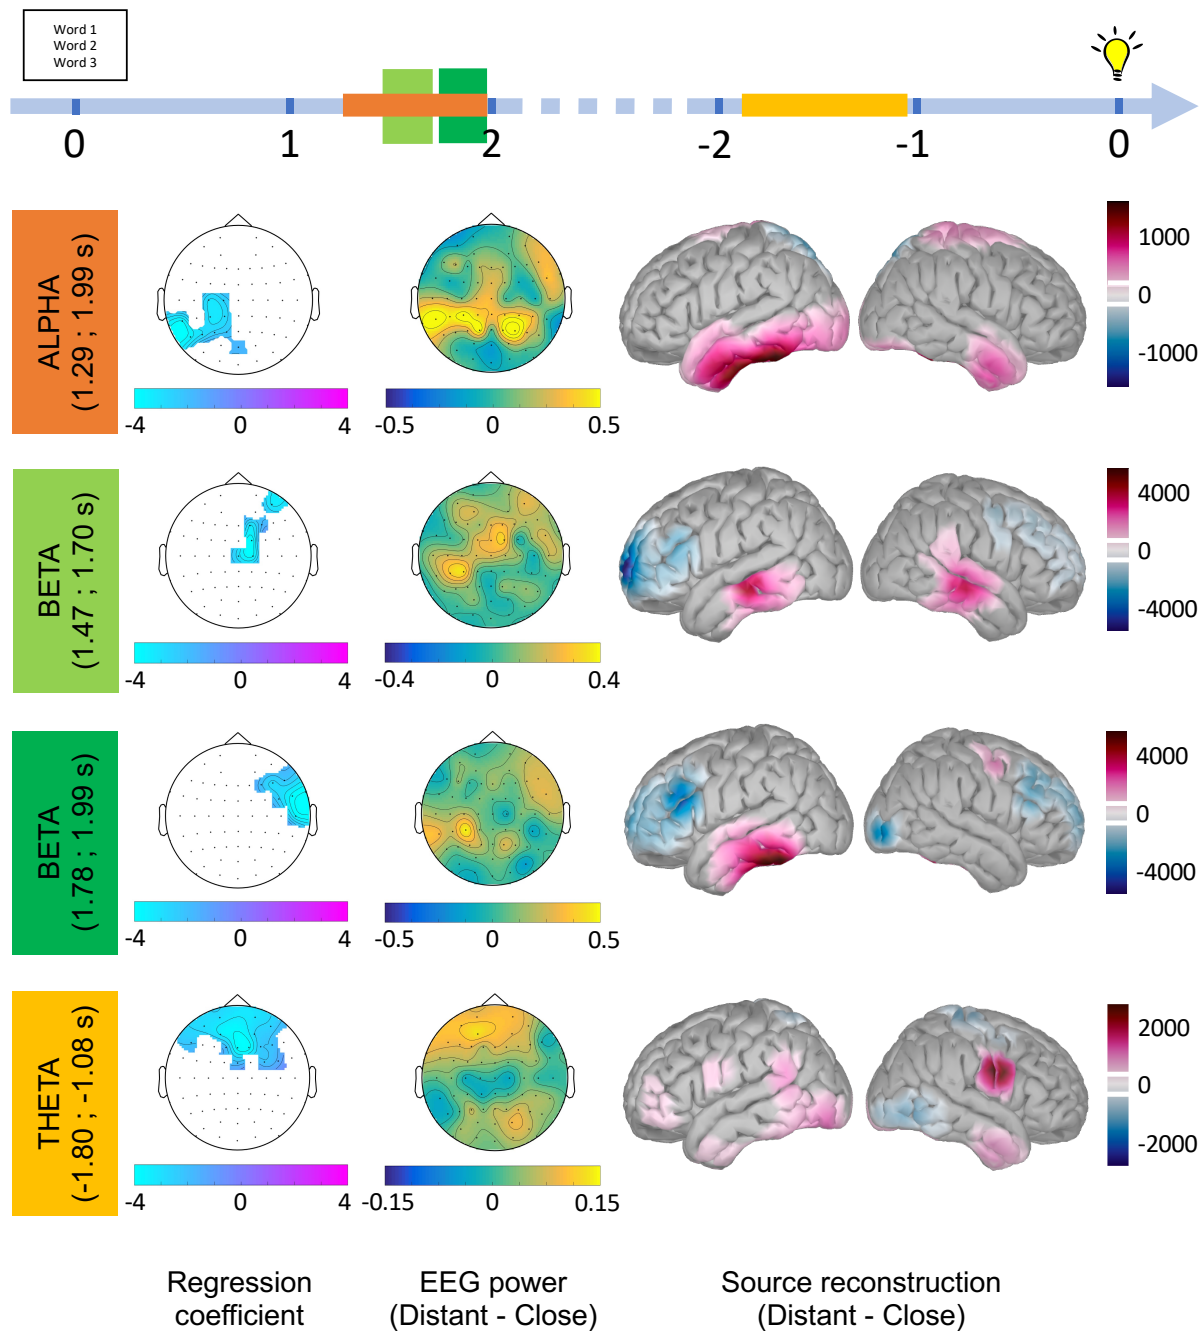

268  
269

270 **Figure 3. EEG effects related to the remoteness of semantic associations.** Top: Time course  
271 (in second) of the task with the two time windows of interest (initial time window between 0  
272 and 2s after the onset of the cue words, and response time window between -2 and 0s before  
273 the response). Colored rectangles symbolize the time period where clusters significantly  
274 associated with the remoteness of semantic associations were observed in the alpha band (in  
275 orange), beta band (in light and dark green), and theta band (in yellow). For each cluster,  
276 the results are further detailed as follows. **First column:** Topographical maps of the clusters. The  
277 significant clusters ( $p_{corr} < 0.05$ ) are represented for each frequency band. The color codes the  
278 regression coefficient values in the significant clusters (color bar from negative values in light  
279 blue to positive values in purple). **Second column:** Topographical maps of the EEG power in  
280 each band contrasted between distant (with low SAS values) minus close (with high SAS) trials,  
281 averaged across subjects and in the time-windows of the clusters (as indicated in the colored

282 rectangles on the left). Color bars indicate EEG power (z-score of dB) from negative (in blue,  
283 distant<close) to positive (in yellow, distant>close) values. **Third column:** Source  
284 reconstruction of EEG activity in each frequency band during the significant cluster time  
285 periods. The cortical source maps were contrasted between conditions (distant - close), and  
286 we represent the difference in source activity, for each frequency, averaged in the time  
287 window of the cluster. The color bar indicates the power (in pA.m) from negative (in blue) to  
288 positive (in purple) values. The white lines in the color bars indicate the threshold used to  
289 visualize the source on the normalized cortical surface rendering.

290

291

292 *Insight problem-solving*

293

294 We found three significant positive clusters, where trials solved with a Eurêka were associated  
295 with significantly higher activity amplitudes than those solved without a Eurêka. All clusters  
296 were observed in the response time window (**Figure 4**). No negative clusters were found.

297 The first positive cluster was observed in the alpha band frequency in left central and  
298 temporal electrodes, between -1.96 and -1.55s before the response button press (13  
299 electrodes,  $\text{sum}(t)=1174$ ,  $p_{\text{corr}}=0.01$ ) (**Figure 4**, "alpha" in orange). The source reconstruction  
300 of EEG activity in the alpha band during the time window of this cluster showed increased  
301 alpha activity of sources mainly located in the left superior parietal lobule and posterior part  
302 of the inferior and middle temporal gyrus. Additionally, sources' alpha activity was reduced in  
303 the right occipital polar cortex when participants reported a Eurêka (**Figure S4A**).

304 The second positive cluster overlapped temporally with the end of the first cluster  
305 during the response window (-1.74 to -1.55s before the response) and was found in the  
306 gamma band in left parieto-temporal electrodes (9 electrodes,  $\text{sum}(t)=372$ ,  $p_{\text{corr}}=7.99 \cdot 10^{-3}$ )  
307 (**Figure 4**, "gamma" in green). The source reconstruction of EEG activity in the gamma band  
308 during the time period of this cluster showed increased gamma activity for Eurêka relative to  
309 no Eurêka trials in the left anterior superior frontal gyrus, around the inferior frontal sulcus  
310 (encompassing posterior part of inferior and middle frontal gyrus) and left middle temporal  
311 gyrus (**Figure S4B**).

312 The last positive cluster was observed in the theta band on centro-frontal electrodes  
313 from -1.62 to -1.06s before the response (14 electrodes,  $\text{sum}(t)=1377$ ,  $p_{\text{corr}}=7.99 \cdot 10^{-3}$ ) (**Figure**  
314 **4**, "theta" in yellow). During the cluster time window, the source reconstruction of EEG activity  
315 in the theta band showed greater theta activity in the inferior part of the right pre- and post-  
316 central gyrus (**Figure S4C**).

317

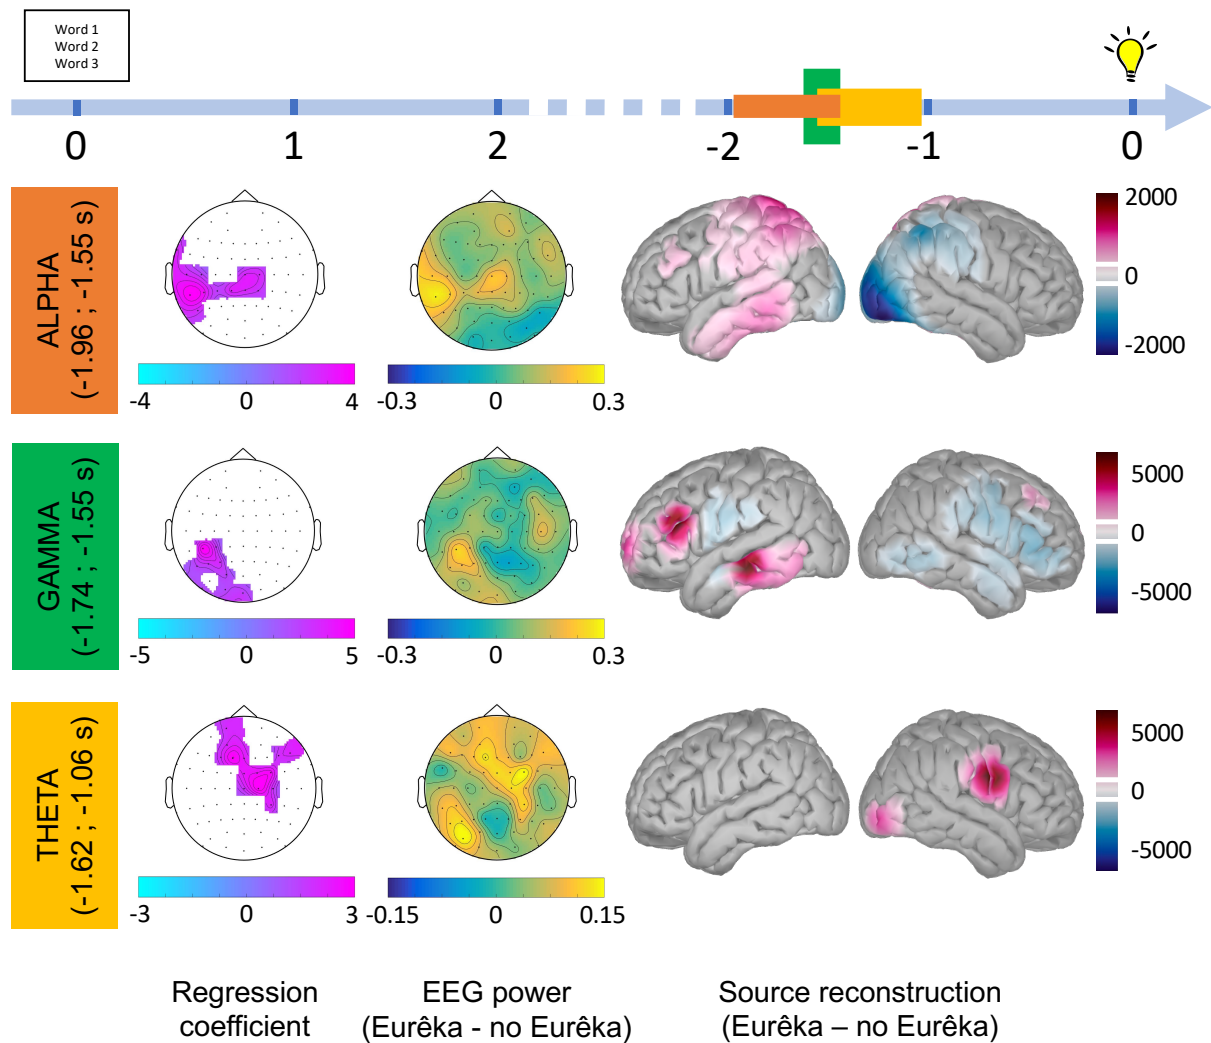

318  
319

320 **Figure 4. EEG effects related to *insight solving*.** **Top:** Time course of EEG activity during the  
 321 two time windows of interest (initial time window between 0 and 2s after the onset of the cue  
 322 words, and response time window between -2 and 0s before the response). Colored  
 323 rectangles symbolize the time period where clusters are significantly associated with Eurêka  
 324 reports in the alpha band (in orange), the gamma band (in green), and the theta band (in  
 325 yellow). For each cluster, the results are further detailed as follows. **First column:**  
 326 Topographical maps of the cluster. The significant clusters ( $p_{corr} < 0.05$ ) are represented for  
 327 each frequency band. The color codes the regression coefficient values in the significant  
 328 clusters (color bar from negative values in light blue to positive values in purple). **Second**  
 329 **column:** Topographical maps of EEG power in each band contrasted between trials with  
 330 Eurêka minus those without Eurêka, averaged across subjects and in the time windows of the  
 331 clusters (as indicated in the colored rectangles on the left). Color bars indicate EEG power (z-  
 332 score of dB) from negative (in blue, Eurêka < no Eurêka) to positive (in yellow, Eurêka > no  
 333 Eurêka) values. **Third column:** Source reconstruction of EEG activity in each frequency band  
 334 during the time periods of the significant cluster. The cortical source maps were contrasted  
 335 between conditions (Eurêka – no Eurêka), and we represent the difference in source activity,  
 336 for each frequency, averaged across the time window of the cluster. The color bar indicates  
 337 the power (in pA.m) from negative (in blue) to positive (in purple) values. The white lines in

338 the color bars indicate the threshold used to visualize the source on the normalized cortical  
339 surface rendering.

340

341

## 342 Discussion

343

344 We explored the neurophysiological correlates of two cognitive components of creative  
345 problem-solving. We used an adapted version of Mednick's task (Mednick, 1962; Bendetowicz  
346 et al., 2017, 2018) to examine the time course of EEG power related to the *insight solving* and,  
347 for the first time, the effect of the *remoteness* of the solution to be found in the context of a  
348 semantic associative combination. In contrast with most of the previous EEG studies using a  
349 similar task that averaged signal across long time-windows or large set of electrodes, or were  
350 restricted to specific electrodes or frequency bands (Jung-Beeman et al., 2004; Razumnikova,  
351 2007; Danko et al., 2009; Luft et al., 2018), we employed a data-driven time-frequency  
352 approach. We found distinct patterns of activity in several frequency bands associated with  
353 *remoteness* and *insight solving*. *Remoteness* was associated with a significant increase in alpha  
354 activity in a left temporo-central cluster and beta activity in a right fronto-temporal cluster  
355 during the initial phase of the task and a later increase in theta activity in a frontal cluster just  
356 before the response. EEG activity changes related to *insight* were observed uniquely in the  
357 period just preceding the response. They included an increase in alpha activity in a left  
358 temporo-central cluster, followed by a gamma activity increase in a left parietal cluster, and  
359 finally an increase in theta band activity in a fronto-central cluster. Overall, these EEG findings  
360 provide new insights into the dynamic mechanisms involved in creative problem-solving.

361 In the following sections, we discuss each result, first, at the sensor level (where robust  
362 two-level statistical analyses corrected for multiple comparisons allowed us to identify  
363 clusters with specific differences in several frequency bands of EEG activities), then at the  
364 source level (the brain areas that showed differences in activity in the frequency bands and  
365 time windows of sensor level clusters).

366

367

### 368 *Remoteness* in associative combination

369

370 The *remoteness* of semantic associations was associated with an increase in activity in the  
371 alpha band, about 1.5 seconds after displaying the cue words. Alpha is the most reported EEG  
372 correlate in creativity studies using various tasks (Fink et al., 2009; Fink & Benedek, 2014; Fink  
373 & Neubauer, 2006; Jauk et al., 2012; Mölle et al., 1996; Shemyakina et al., 2007; Zhou et al.,  
374 2018; MASTRIA et al., 2021), including the RAT (Jung-Beeman et al., 2004; Sandkühler &  
375 Bhattacharya, 2008; Luft et al., 2018). Alpha activity increases with the creative requirements  
376 of the task (Fink & Benedek, 2014). It has been interpreted as an active inhibition (Klimesch et  
377 al., 2007; Klimesch, 2012) of external, non-relevant stimuli, allowing the increase of internal  
378 processing (Cooper et al., 2006; Cona et al., 2020) and internally-oriented attention (Fink &  
379 Benedek, 2014; Lustenberger et al., 2015). Klimesch (Klimesch, 2012) postulated that alpha-  
380 related inhibition is needed to explore and navigate in semantic memory, which is organized  
381 as a network. More precisely, access to remote knowledge may require that closely related,  
382 but not relevant memory information, is inhibited. Distant CAT trials likely required extended  
383 access to the knowledge stored in semantic memory as participants had to find a remote  
384 solution and inhibit close but irrelevant associations. The increase in alpha band activity during

385 the initial time may reflect this process. The source reconstruction suggested that the effect  
386 of *remoteness* in the alpha band involved the left (and to a lesser extent to the right) inferior  
387 and middle temporal gyrus. Previous studies have identified different temporal regions as key  
388 brain areas for semantic processing (Hickok & Poeppel, 2004; Binder et al., 2009; Visser et al.,  
389 2012; Ralph et al., 2017) with distinct roles for regions along the rostro-caudal and supero-  
390 inferior axes (Ralph et al., 2017). The anterior temporal lobe appears as a transmodal hub in  
391 semantic processing in interaction with more posterior temporal areas. The left inferior  
392 temporal gyrus plays a role in semantic representation and word meaning (Whitney et al.,  
393 2011). The left posterior middle temporal gyrus is involved in a semantic control network  
394 (Noonan et al., 2013; Teige et al., 2019; Evans et al., 2020; Vatansever et al., 2021). Semantic  
395 control is likely involved in CAT, especially in the distant trials where participants had to  
396 retrieve remote associations and combine them. Neuroimaging studies using RAT-like tasks  
397 have reported the involvement regions of the semantic control network (Anderson et al.,  
398 2009; Gonen-Yaacovi et al., 2013; Jefferies & Wang, 2021). The involvement of semantic  
399 control in CAT is also consistent with previous research linking alpha activity with cognitive  
400 control (Sadaghiani & Kleinschmidt, 2016). Overall, the initial alpha activity that we found may  
401 reflect enhanced controlled access to the knowledge required by distant trials.

402 The *remoteness* of the associative combination was also associated with an early  
403 increase in beta power in the right centro-temporal and temporo-frontal electrodes. This beta  
404 activity temporally overlapped with the alpha cluster described above. Variation of beta  
405 activity during creative thinking or problem-solving is not classically reported. A few studies  
406 reported an increase in beta activity in frontal and temporal electrodes associated with the  
407 RAT (Razumnikova, 2007) or during other creativity tasks (Rosen & Reiner, 2016; Zioga et al.,  
408 2020), but its functional role in the context of creativity is not understood. Beta activity is  
409 usually associated with motor preparation, but in different regions and time windows than in  
410 our study (da Silva, 2009; Weiss & Mueller, 2012). Hence, the observed higher beta activity  
411 for more remote combinations may reflect non-motor cognitive processes. Enhancement of  
412 beta-band activity has been related to various aspects of language processing (Weiss &  
413 Mueller, 2012), such as the maintenance of a mental state during a cognitive task requiring  
414 language (Engel & Fries, 2010) or of visual object representation in short-term memory  
415 (Tallon-Baudry et al., 1999). The role of beta activity increase in distant CAT-solving is not  
416 obvious. One can speculate that when the cue words to be combined are not quickly  
417 converging to a solution, the current mental activity (i.e., active exploration of semantic  
418 memory related to the alpha activity) should be maintained, increasing beta activity in the  
419 distant condition.

420 Finally, *remoteness* was associated with higher theta activity one second before the  
421 subject's response, involving fronto-temporal regions. Theta activity in creative problem-  
422 solving has been scarcely reported (Razumnikova, 2007; Sandkühler & Bhattacharya, 2008).  
423 The role of theta activity in cognition is debated. Prefrontal theta activity has been associated  
424 with several aspects of executive control functions. Cavanagh and colleagues (Cavanagh et al.,  
425 2012; Cavanagh & Frank, 2014) proposed that theta rhythm generated by the median PFC  
426 region is involved in monitoring novelty, conflict, and surprise. Theta activity increases when  
427 information is accumulated (Cavanagh et al., 2012; Cavanagh & Frank, 2014). When controlled  
428 processes are engaged during goal-directed behavior, theta band coherence between frontal  
429 and other relevant brain regions increases (Zavala et al., 2018). Several studies have also  
430 associated theta activity with other controlled processes and functions such as inhibition  
431 (Adelhöfer & Beste, 2020), planning (Domic-Siede et al., 2020), prioritizing relevant

432 information in working memory (Riddle et al., 2020), or analytical reasoning (Williams et al.,  
433 2019). Importantly, theta activity has been related to memory retrieval and encoding (Düzel  
434 et al., 2010) and may reflect integration processes that allow us to build new connections  
435 between elements of knowledge in semantic memory (Backus et al., 2016; Nicolás et al.,  
436 2021). Hence, theta band activity associated with distant CAT may reflect controlled retrieval  
437 and integration in semantic memory. Consistent with this interpretation, the central  
438 contribution of executive and memory processes in creativity is now well established (Cassotti  
439 et al., 2016; Beaty et al., 2016; Volle, 2017; Benedek & Jauk, 2018; Benedek & Fink, 2019).  
440 Recent studies have demonstrated the important role of the executive control network for  
441 creative thinking (Beaty et al., 2016, 2017; Bendetowicz et al., 2018). The executive control  
442 network supports several control processes involved in creative thinking such as working  
443 memory, inhibition, attentional control, planning, flexibility, and control and selection in  
444 memory retrieval. The source reconstruction of our theta-related cluster revealed a set of left  
445 regions largely coherent with the executive control network, such as the rostro-lateral PFC,  
446 parieto-temporal junction, and temporal regions. The rostro-lateral part of the PFC is a node  
447 of the executive control network that has been shown critical for solving CAT in frontal  
448 patients, especially in distant trials (Bendetowicz et al., 2018). Additionally, the grey matter  
449 volume in this region was also correlated with performance at this task (Bendetowicz et al.,  
450 2017). The particular role of the left rostro-lateral PFC in the CAT may be to combine the  
451 retrieved associates or integrate the result of the search from each cue word, i.e., in the  
452 relational integration of distant items (Aichelburg et al., 2016; Green et al., 2016; Urbanski et  
453 al., 2016). Thus, observing theta power increase during the response time window is  
454 consistent with previous studies using different methods showing the involvement of the left  
455 rostro-lateral PFC and executive control network in creativity. The source reconstruction also  
456 located theta activity in the right inferior pre- and post-central gyrus, a result that was shared  
457 between *remoteness* and *insight* analyses and is discussed below.

458  
459 Overall, our results combined with the existing literature suggest that remote  
460 associative semantic combination relied on several controlled processes in distinct periods of  
461 CAT-solving (**Figure 5**). Hypothetically, in the initial phase of the task, semantic control  
462 (supported by alpha activity in the posterior middle temporal gyrus) may enable the  
463 exploration of semantic memory in search of remote associates (in relation to alpha activity  
464 in infero-temporal regions, including the temporal pole). The semantic search or search space  
465 might be reflected in the overlapping beta activity, that is associated with the maintenance of  
466 a current mental state or representation. Finally, just before the response, the increased  
467 prefrontal theta activity may reflect the involvement of other executive controlled processes,  
468 allowing to integrate and combine the search results from each cue word, evaluate the  
469 generated candidate solution, and finally select the most appropriate response.

470  
471

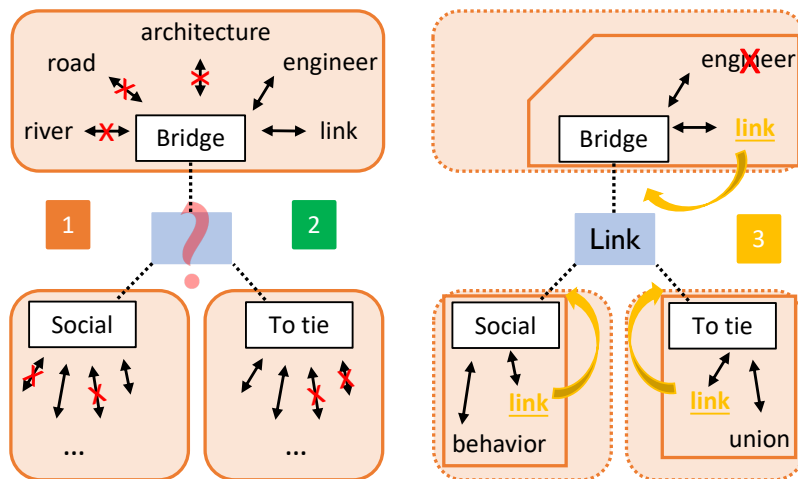

### 1- Generation of remote associates

Generation of semantic associations ( $\leftrightarrow$ ):

- Semantic representation
- Word meaning

Semantic control (X):

- Active inhibition of non relevant associations
- Increase internal processing
- Create remote associates

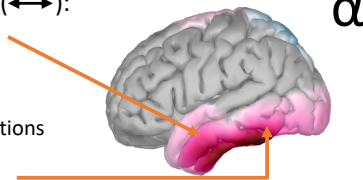

$\alpha$

### 2- Maintenance of related cognitive activity

To maintain the active exploration of semantic memory

- To maintain the actual cognitive state
- To maintain the visual representation of words

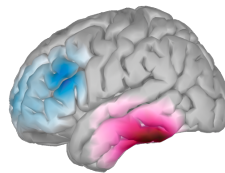

$\beta$

### 3- Executive controlled processing

- To integrate and combine the search results from each cue word
- To evaluate the generated candidate solution
- To select the most appropriate response

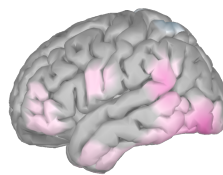

$\theta$

472  
473

474 **Figure 5. Hypothetical model of remote associative combination.** Combined with the existing  
475 literature, our results suggest that solving a distant CAT (relative to a close one) requires  
476 generating remote semantic associates to each of the three cue words. This is supported by  
477 alpha activity in temporal areas (in orange). Overlapping beta activity might facilitate this  
478 process by maintaining related cognitive activity (in green). Then, executive controlled  
479 processing is needed to integrate, combine, evaluate and select the appropriate response.  
480 This final step is supported by theta activity found in brain regions involved in the executive  
481 control network.

482

483

484 Insight solving

485

486 The second aspect of the CAT that we analyzed, the effect of *insight solving*, was associated  
487 with distinct EEG correlates than remote associative combinations. Eurêka-related EEG  
488 differences were observed only during the response time window, suggesting that the early  
489 stages of problem-solving were similar for trials with or without Eurêka. It might be explained  
490 by the fact that the two solving modes (with and without Eurêka) are not exclusive and may  
491 co-occur within a trial. It is possible that people initially used analytical thinking until they  
492 reach an impasse and finally solved the problem with insight. Cognitive theories link insight  
493 with the need to experience a mental impasse and to restructure the problem representation  
494 before solving it with insight (Ohlsson, 1992; Sandkühler & Bhattacharya, 2008). It may thus  
495 be not surprising that insight and non-insight trials only differ in the period just preceding the  
496 response. Nevertheless, we examined only the first and last two seconds of problem-solving.  
497 We cannot exclude that differences between trials with Eurêka and without Eurêka occurred  
498 in between these time windows.

499 Just before the response, we observed successive modulation of alpha- and gamma-  
500 band activities for trials with Eurêka (compared to those without Eurêka), which is consistent  
501 with previous EEG studies (Jung-Beeman et al., 2004; Sandkühler & Bhattacharya, 2008; Sheth  
502 et al., 2009; Oh et al., 2020). The source reconstruction suggested that alpha activity related  
503 to Eurêka involved the left posterior inferior and middle temporal gyrus and the parietal  
504 region. Although the alpha activity associated with the *remoteness* and *insight solving* effects  
505 showed some similarities, they occurred at different time periods (initial vs. response time  
506 windows), suggesting that they reflected distinct mechanisms. Given the role of alpha in  
507 inhibition processes and the involvement of the left inferior and middle temporal gyrus in  
508 semantic processing discussed above, the Eurêka-related alpha increase may reflect the  
509 inhibition of non-relevant information to overcome the mental impasse and restructure the  
510 problem (Sandkühler & Bhattacharya, 2008). The source reconstruction also suggested that  
511 the superior parietal lobule, a region often showing alpha activity in relation to creativity (Fink  
512 & Benedek, 2014), played a role in *insight solving*. Given the classical role attributed to alpha  
513 activity in parietal areas in creativity research, this cluster might alternatively or additionally  
514 reflect in increased state of internally oriented attention during trials with *insight solving* (Fink  
515 & Benedek, 2014).

516 Succeeding to alpha, we observed a gamma activity increase in left parietal electrodes,  
517 which involved the left anterior superior frontal gyrus, left posterior inferior, and middle  
518 frontal gyrus and left middle temporal gyrus. An increase in gamma activity is often reported  
519 by studies exploring insight problem-solving (Jung-Beeman et al., 2004; Sandkühler &  
520 Bhattacharya, 2008; Sheth et al., 2009; Rosen & Reiner, 2016; Oh et al., 2020) and was related  
521 to the suddenness of the solution (Sandkühler & Bhattacharya, 2008). Gamma burst has been  
522 associated with the sudden awareness of a mental representation from memory (Tallon-  
523 Baudry et al., 1999; Engel et al., 2001; Engel & Singer, 2001). Hence, the gamma activity  
524 observed during the CAT-solving with *insight* may reflect the awareness of a solution that  
525 popped up suddenly in mind, yielding the subjective Eurêka experience.

526 The similar alpha followed by gamma synchronization associated with insight reported  
527 by previous studies involved distinct electrodes that we observed, especially in the right  
528 hemisphere (Jung-Beeman et al., 2004; Sandkühler & Bhattacharya, 2008; Sheth et al., 2009).  
529 The reasons for this left-right difference with our results are unclear. They might relate to the  
530 use of different paradigms. Previous studies mostly used the compound remote associate  
531 task, requiring finding a word that forms a compound word with each cue. Instead, we use a



532 version where the solution is associatively related to the cue words. Thus, our task may rely  
533 more on semantic processing than the compound remote associate task, thus recruiting more  
534 left-brain areas (Hickok & Poeppel, 2004; Gonzalez Alam et al., 2019). Another methodological  
535 difference is that previous EEG studies on insight focused on specific scalp regions or  
536 frequency bands based on a priori hypotheses. In contrast, we used a data-driven approach  
537 considering all the electrodes and frequencies in our analyses while controlling for multiple  
538 comparisons. It potentially revealed new brain correlates of insight problem-solving. In  
539 addition, as in other EEG studies based on the RAT (Sandkühler & Bhattacharya, 2008; Oh et  
540 al., 2020), we observed alpha and gamma effects earlier than in Jung Beeman and al study  
541 (Jung-Beeman et al., 2004). This difference may relate to the instructions given to our  
542 participants of pressing the space bar when they thought the solution they had in mind was  
543 correct. It may have encouraged the participants to evaluate their solution more carefully and  
544 added a delay between the insight moment and button press.

545 Finally, as for remote trials, insight trials were associated with higher theta activity in  
546 frontal electrodes. This theta activity may reflect conflict monitoring because when the  
547 solution arises suddenly in consciousness, a conflict (or surprise) with the ongoing mental  
548 representations or ideas can arise, signaling a need for monitoring and selection. The source  
549 reconstruction located a potential source in the right inferior part of the pre- and post-central  
550 gyri. Although sensorimotor regions in creativity has already been described (Matheson &  
551 Kenett, 2020), its role remains challenging to interpret. Interestingly, this region was also a  
552 candidate source for the theta activity associated with *remoteness* during the same time  
553 window. *Remoteness* in associative combination and *insight solving* are often confused in  
554 previous studies (Dietrich & Kanso, 2010), leading to an unclear link between them. According  
555 to some theory, they are both resulting in overcoming a mental impasse suggesting that they  
556 might share similar thread in the time course of EEG power. In our study, we explored both  
557 components with the same task. Overall, our results did not suggest a link between *insight*  
558 *solving* and *remoteness* (no significant interaction at the behavioral level, distinct brain cluster  
559 at the sensor level). The shared sources in the theta band frequency cannot be explained by  
560 an imbalance in the distribution of trials between the two conditions (for instance, more  
561 Eurêka reports in distant trials) as the average number of trials included in the EEG analyses  
562 did not significantly differ between conditions (see *Supplementary Data*). Even if our source  
563 reconstruction is not specific to the cluster found at the sensor level (but rather to a frequency  
564 band during a specific time window), we cannot exclude that *remoteness* and *insight* effects  
565 shared some similar brain event occurring just before the response. Further study will be  
566 needed to clarify this question.

567  
568 To summarize (**Figure 6**), we show that *insight solving* is associated with successively  
569 increased alpha, gamma, and theta power during the last seconds of a CAT-solving. Alpha  
570 activity could help to overcome strong but obvious associations of ideas. The solution could  
571 hence suddenly emerge in the individual's mental representation, and lead to a gamma  
572 activity. Then, a conflict might occur between the Eureka-mediated solution and the  
573 previously ongoing mental thinking. This conflict needs to be monitored and controlled, which  
574 may be reflected by the increase in theta activity.

575  
576

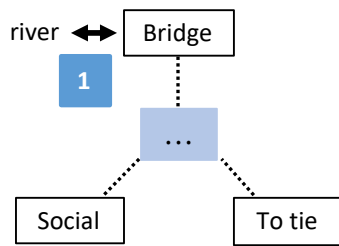

**1- Impasse mentale**  
 → Result from initial solving phase (Figure 6) that failed  
 → Strong association (↔) or no more new associates

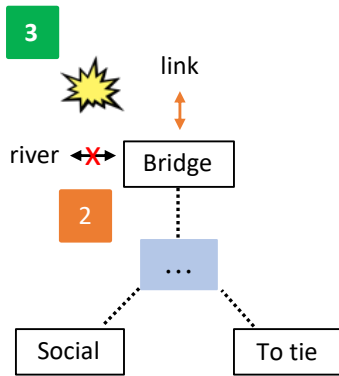

**2- Restructuration**  
 → To overcome the mental impasse  
 → Inhibition of strong association (X)  
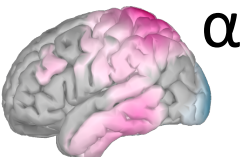  $\alpha$

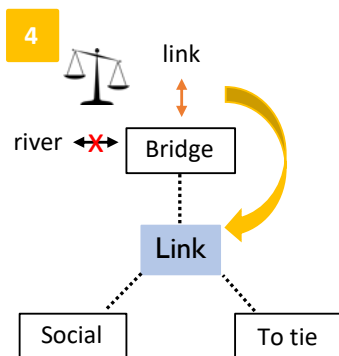

**3- Eureka moment**  
 → Sudden awareness of a new mental representation from memory (★)  
 → Lead to a conflict or surprise with the ongoing mental representations or ideas  
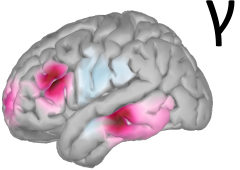  $\gamma$

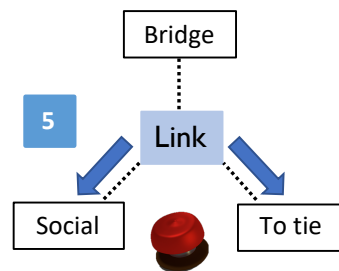

**4- Control processes**  
 → To monitor and control conflict and surprise (⚖️)  
 → To select solution  
  $\theta$

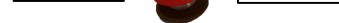

**5- Verification**  
 → To evaluate the selected response  
 → Delay between the Eureka moment and the press button (●)

577  
 578  
 579  
 580  
 581  
 582  
 583  
 584  
 585  
 586  
 587  
 588

**Figure 6. Hypothetical model of insight solving related results.** After reaching a mental impasse (in blue), restructuration is needed to break out it. Inhibition of strong associations can be supported by alpha activity in temporal areas (in orange). When a new association suddenly arises in consciousness, a realization of the solution occurs (supported by gamma activity, in green). It ensures a conflict or surprise that needs to be monitored to select the appropriate association (supported by theta activity, in yellow), verified before answering (in blue).

**Limitations**

589

590 This study is not without limitations. First, the CAT is a difficult task with a low correct response  
591 rate, often around 60%. Added to the constraints related to EEG artefact cleaning, we included  
592 in our analyses much fewer trials than expected. We chose not to analyze incorrect trials since  
593 the cognitive involvement of the participants in incorrect trials is uncontrolled. Second, the  
594 usually long response time in such a task led us to analyze fixed time windows at the beginning  
595 and end of each trial without considering the time in between. We thus do not provide the  
596 whole picture of the processes happening during our task. Finally, it may be noted that the  
597 individual MRIs of the participants were not available. Thus, source reconstruction results  
598 must be interpreted cautiously and entail more uncertainty than the effects we characterized  
599 at the sensor level. However, the involved regions are broadly consistent with the  
600 neuroimaging literature, and our results offer new perspectives on potential networks  
601 involved in creative problem-solving. Finally, we used the most used and validated approach  
602 with self-reports of Eureka experience to define *insight solving* (Laukkonen & Tangen, 2018).  
603 However, the best method to capture the insight phenomenon that would best reflect specific  
604 solving mechanisms is an open question.

605

606

## 607 **Conclusion**

608

609 This study explored the EEG correlates of two aspects of RAT problem-solving, *remoteness* in  
610 associative combination and *insight solving*. We showed distinct patterns of brain activity in  
611 the time-frequency domain for these two aspects. First, *semantic remoteness* was associated  
612 with an early alpha and beta activity in latero-temporal regions and a theta activity in frontal  
613 areas just before the response. These results suggest that early controlled processes may  
614 guide and constrain the search of remote associates, whereas later controlled processes may  
615 integrate or combine the retrieved information. Second, *insight solving* was associated with  
616 alpha then gamma activity in infero-temporal regions and theta activity in frontal areas, which  
617 occurred just before the response. These findings indicate that *insight* is supported by specific  
618 brain dynamics distributed in space and time that may relate to a sudden restructuration of  
619 the problem or its solution. Furthermore, late theta activity might also suggest that solving a  
620 problem with *insight* also includes the involvement of control processes, possibly in the  
621 facilitation or monitoring of the Eureka-mediated solution. Further work is needed to  
622 overcome approximates of source reconstructions. Combining neuroimaging approaches or  
623 recording intracranial EEG signal can be promising methods for future research to better  
624 understand brain correlates of creative problem-solving.

625

626

## 627 **Method**

628

### 629 **Participants**

630

631 Twenty-three right-handed native French speakers aged from 21 to 25 years old (mean  
632 age=23.04; standard deviation, SD=1.15; 13 women) were included in the study. All  
633 participants were healthy adults with MMSE  $\geq$  28 (Folstein et al., 1975), no history of  
634 neurological and/or psychiatric illness, no psychoactive substance abuse, nor consumption  
635 less than 24 hours before the experiment. Two participants were excluded because of

636 technical problems during the experiment. The analyzed sample thus consisted of 21 healthy  
637 adults (mean age=22.95, SD=1.15 years old, 12 women). A national ethical committee  
638 approved the study. All the participants gave their written informed consent and received  
639 financial compensation.

640

#### 641 Experimental task

642

643 EEG was recorded during the performance of the CAT (Bendetowicz et al., 2017, 2018), which  
644 is an adapted version of the RAT (Mednick, 1962). In such a task, subjects are asked to provide  
645 a word that connects three unrelated cue words. Our adapted version varied the semantic  
646 strength association (SAS) between the cue words and the expected solution, based on French  
647 associative norms (Debrenne, 2011; Bendetowicz et al., 2017, 2018). We considered the  
648 average SAS between the expected solution and each of the three cue words within each trial.  
649 Hence, every trial was characterized by a SAS value: the lower the SAS value, the more remote  
650 the solution was from the cue words (an example trial with a low SAS value - hence distant  
651 solution - is Bridge-Social-To tie, where the solution is Link; an example trial with a high SAS  
652 value – hence close solution – is Street-Countryside-Centre, where the solution is Town).  
653 Previous studies using the CAT (Bendetowicz et al., 2017, 2018) have shown that the  
654 performance in this task, especially for distant trials, correlated with other creative  
655 assessments suggesting its external validity. Following the same principles as in the original  
656 CAT, we built 28 additional trials for the current study in order to anticipate the loss of  
657 analyzable trials due to EEG experimental constraints and artifacts. In total, each participant  
658 performed 100 trials (median SAS value 6.5, range from 0.3 to 38.8).

659 During the experiment, the participants were seated comfortably in front of a  
660 computer screen. Before starting the task, the examiner explained the general design and  
661 instructions with written support. Explanations on Eurêka were particularly detailed. It was  
662 described as "the subjective experience you can have when you solve a problem, and the  
663 solution comes to mind suddenly, it is not the result of cognitive efforts, and you are not able  
664 to report the mental steps leading to this solution". It was opposed to analytic solving in which  
665 "you have a strategy and the feeling of gradually getting closer to the solution". We clarified  
666 that these two solving methods were not incompatible or exclusive and instructed the  
667 participants to consider only a few seconds before their response. To ensure the participants  
668 understood the instructions correctly, they completed ten practice trials, and the instructions  
669 were repeated when needed. After instructions and training, the participants performed 100  
670 trials in random order while EEG was recorded. Breaks were proposed to the participants  
671 every 25 trials to limit fatigue.

672 The CAT was computerized and programmed using the Psychtoolbox (version 3.0.11)  
673 running in MATLAB (MATLAB version 9.0 (R2016a), Natick, Massachusetts: The MathWorks  
674 Inc.) (**Figure 1**). For each trial, the three cue words were displayed on the center of the screen,  
675 one above the other to limit eye movements as much as possible. The participants were asked  
676 to give a unique word related to all three cue words and had up to 30s to respond. They were  
677 aware that the response could be a noun, a verb, or an adjective but not a proper noun or a  
678 compound word. As soon as they thought they had found the correct answer, they pressed  
679 the space button of the keyboard. This made the three words disappear, and the participants  
680 had then a fixed time of 2.5s to tell their response verbally. The screen remained blank during  
681 this period. The examiner wrote down the participant's response. In addition, as classically  
682 performed in previous studies using similar tasks, we collected the self-report "Eurêka"

683 experience on a trial-by-trial basis (Kounios & Beeman, 2014). Thus, after the 2.5s response  
684 period, the question "Eurêka?" was displayed on the screen. The participants had to indicate  
685 whether the solution they gave came to their mind with a Eurêka by pressing the keyboard  
686 letters "V" (Eurêka) or "N" (no Eurêka) within a time limit of 5s. A central fixation cross was  
687 displayed during the intertrial interval followed by a jittered duration (mean=1.5s, range  
688 between 1.2s and 1.8s).

689

690

### 691 Behavioral measures and analyses

692

693 Accuracy (correct or incorrect) was determined based on the French associative norm  
694 (Debrenne, 2011; Bendetowicz et al., 2017). Responses were also considered valid if they were  
695 lexically similar or synonyms to the one defined by the French associative norm. Finally, few  
696 additional answers were accepted if they provided semantic similarities with the cue words  
697 but were not in the French associative norm. In this case, only responses selected by a panel  
698 of five external judges were considered correct. We defined response time (RT) as the time  
699 between the onset of the display of the cue words and the space bar press.

700 Each trial is characterized by a SAS value (a continuous variable determined by the  
701 material and fixed between subjects) and can be categorized according to how the subject  
702 solved it (with or without Eurêka; binary variable that depends on each subject). To estimate  
703 the effect of *remoteness* (SAS) on performance, we computed the percentage of individuals  
704 with correct responses (i.e., number of individuals who gave a correct response divided by the  
705 total number of participants) and the mean RT for correct responses on a trial-by-trial basis.  
706 We explored the relation of accuracy and RT with the corresponding SAS value using Spearman  
707 correlations.

708 We also explored how many trials were solved (or not) with a Eurêka and without a  
709 Eurêka. To examine whether trials solved with a Eurêka differed from those without a Eurêka,  
710 we compared the averaged percentage of Eurêka and no Eurêka, and the averaged RT of trials  
711 with and without Eurêka across individuals. We focused on correct trials as incorrect ones  
712 were excluded from the EEG analysis. Statistical comparisons were performed using non-  
713 parametric paired Wilcoxon tests.

714 Finally, we explored the link between the effect of SAS and Eurêka using a two-level  
715 modeling approach. First, we ran a Global Linear Model (GLM; using the glmfit function in  
716 MATLAB) at the individual level using only correct trials. Taking advantage of the SAS value of  
717 each trial, we used logistic regression to explore whether the SAS predicted a Eurêka. As we  
718 expected the SAS to be correlated with RT, we removed the variance explained by RT from the  
719 SAS variable. We then computed a logistic regression exploring the relationship between the  
720 corrected SAS and Eurêka. Then, for the second-level analysis, we computed a one-sample  
721 two-tailed t-test (against zero) on the subject's regression coefficients resulting from the GLM.  
722 This allowed us to analyze the relation between Eurêka reports and SAS at the group level.

723

724

### 725 EEG

726

727 *EEG recording:* EEG data were recorded using BRAINAMP DC system (Brain Products GmbH,  
728 München, Germany) with 64-active electrodes mounted in an elastic cap (actiCAP) according to  
729 the extended International 10–20 system and including a row of low fronto-temporo-occipital

730 electrodes (PO9/10, TP9/10, FP9/10). Two additional electrodes were used as reference (FCz  
731 electrode) and ground (AFz electrode). Disposable electrodes placed above and below the  
732 right or left eye and lateral to the outer canthus of both eyes recorded vertical and horizontal  
733 EOG, respectively. Electrode impedances were at or below ten kOhm. The EEG data were  
734 recorded at 1 kHz with an online 0.016-250 Hz bandpass filter.

735  
736 *EEG preprocessing:* All EEG preprocessing and analyses were performed using the FieldTrip  
737 toolbox (Oostenveld et al., 2011), completed by homemade scripts, and brainstorm (version  
738 09-Sep-2020) (Tadel et al., 2011) running under MATLAB (MATLAB version 9.0 (R2016a),  
739 Natick, Massachusetts: The MathWorks Inc.).

740 EEG signal was downsampled offline to 128 Hz, and filtered with zero phase, third  
741 order high pass, and low pass Butterworth filters (set at 0.5 and 63 Hz, respectively).  
742 Independent component analysis (ICA) was used to detect and remove artefacts caused by  
743 eye blinks. On average, two independent components (IC) were removed after the visual  
744 inspection of the time series and topographies of the IC. Then, the EEG signal was visually  
745 inspected to exclude artifacts related to muscles or movements. Next, noisy channels were  
746 interpolated using the averaged signal of adjacent channels. A mean of 7 electrodes (SD=2.1)  
747 was interpolated across participants. Trials containing more than 10% of bad channels were  
748 removed (11 trials per individual on average, SD=6.5). Finally, the signal was re-referenced to  
749 the average of all electrodes (recovering the FCz channel).

750 We segmented the EEG signal for each trial in two time windows of interest. First, the  
751 "initial time window" corresponded to the 2s period following the onset of the cue word  
752 display on the screen. Second, the "response time window" corresponded to the 2s period  
753 preceding the space bar press (i.e., the subject's response). We considered only correct trials  
754 for EEG data analysis. We excluded the trials with an RT shorter than 4s to avoid overlapping  
755 our two time windows (14 trials excluded on average per individual, SD=9.5).

756 Averaged numbers of analyzed trials across individuals are presented in **Table S1**. In  
757 addition, supplementary analyses are provided to ensure there was no unbalance between  
758 the number of trials analyzed across conditions (i.e., *semantic remoteness* and *insight solving*;  
759 see supplementary material).

760  
761 *Time-frequency computation:* Time-frequency maps were computed for each electrode, trial,  
762 and time window (initial and response) in a frequency range between 3 and 60 Hz. We used a  
763 multitaper time-frequency transform (Slepian tapers, lower frequency range: 3-32 Hz, six  
764 cycles, and three tapers per window; higher frequency range: 32-60 Hz, fixed time-windows  
765 of 240ms, 4-31 tapers per window). This approach allows better control of time and frequency  
766 smoothing. It uses a constant number of cycles across frequencies up to 32 Hz (hence a time  
767 window with a duration that decreases when frequency increases) and a fixed time window  
768 with an increasing number of tapers above 32 Hz in order to obtain more precise power  
769 estimates by adaptively increasing smoothing at high frequencies. Hence, the resulting EEG  
770 power represents the signal amplitude in a given frequency after its spectral decomposition.  
771 Time courses were aligned to the onset of the cue word display for the initial time window  
772 (corresponding to time 0 for the initial time window epochs) and the space bar press for the  
773 response time window (corresponding to time 0 for these latter epochs). We performed a z-  
774 score baseline correction of time-frequency maps using the time-frequency maps computed  
775 from the EEG signal recorded -1.2 s to -0.1 before the onset of the display of the cue words on  
776 each trial. Finally, time-frequency maps were averaged along the frequency dimension

777 according to the four frequency bands: theta 3-7 Hz, alpha 8-12 Hz, beta 13-30 Hz, and gamma  
778 31-60 Hz.

779

780 *Task-based analysis:* As for the behavioral analysis, we used a two-level statistical analysis  
781 approach at the sensor level. First, we used individual linear regressions to explore the relation  
782 between EEG power and behavior. To explore EEG correlates of *semantic remoteness*, we used  
783 EEG power as the dependent variable and *SAS* as the independent variable. To explore *insight*  
784 *solving*, EEG power was the dependent variable, and the Eurêka report was the independent  
785 variable. These two analyses were performed independently at the individual level for each  
786 point in time, in each frequency band (theta, alpha, beta, gamma), and for each time window  
787 (initial and response time window). This first level of analysis allowed us to obtain regression  
788 coefficients at the individual level. Then, at the second (group) level, the resulting individual  
789 regression coefficients were analyzed at the between-subject level with a one-sample two-  
790 tailed t-test against zero. According to the following procedure, we corrected our results for  
791 multiple comparisons using a cluster-based correction for the time and space (electrode)  
792 dimensions. For each frequency band and time window of interest, the results from the one-  
793 sample t-tests performed at each time point and on each electrode were clustered based on  
794 spatio-temporal and statistical criteria. The cluster spatial extent was defined as at least one  
795 neighboring electrode in either time or space based on the template "easycapM1" provided  
796 by the Fieldtrip toolbox and matched our electrode cap. The clusters formation considered  
797 only the (time, electrode) points where the one-sample t-tests were significant with a *p-value*  
798 lower than 0.0125. We selected this statistical threshold because we computed a cluster-  
799 based analysis for each of the four frequency bands of interest ( $0.05/4=0.0125$ ). Then, we  
800 computed the sum of the t-test statistics within each obtained cluster ( $\text{sum}(t)$ ). In order to  
801 obtain the distribution of this cluster statistics under the null hypothesis while correcting for  
802 multiple comparisons, we repeated this analysis on 1000 Monte Carlo randomizations,  
803 retaining only the maximum value of the sum of t-test across clusters on each randomization.  
804 The clusters obtained from the original data were finally considered significant if their *p-value*  
805 ( $p_{\text{corr}}$ ) was lower than 0.05 across the 1000 randomizations.

806

807 *Source reconstruction:* We explored the brain regions related to the significant clusters  
808 observed at the sensor level using source localization. For this, we analyzed the cortical  
809 sources in the time windows and the frequency bands in which significant clusters were found.  
810 We used the Brainstorm software that is freely available for download online under the  
811 General Public License (<http://neuroimage.usc.edu>; (Tadel et al., 2011)).

812 For each individual, first, a head model was computed using the symmetric boundary  
813 element method (BEM) method from OpenMEEG open-source software (Gramfort et al.,  
814 2010), based on the template MRI normalized in the Montreal Neurological Institute (MNI)  
815 system, available in Brainstorm software (MNI/Colin27), and coregistered with the 65  
816 electrodes considering standard 10-10 electrode coordinates. Next, the noise covariance  
817 matrix was computed on the time window of interest of all trials with a baseline corresponding  
818 to the time period preceding the onset of the word triplet (-1.2s to -0.1s). Sources were then  
819 computed at the trial level using preprocessed EEG signal (that is, 128-Hz, ICA-corrected,  
820 average-referenced EEG signal). Next, we applied a weighted minimum norm imaging (wMNE)  
821 method with current density map measures computed for 15000 trihedral dipoles – total of  
822 45000 elementary dipoles, equivalent to sources unconstrained in their orientation –  
823 distributed over the cortical mantle of the brain model obtained from the standard MNI/Colin

824 27 brain template. Then, we computed the power within the considered frequency band using  
825 a Hilbert transformation at the source level for each cluster identified at the sensor level (i.e.,  
826 in each time window and frequency band of interest). Since we used unconstrained  
827 orientations for the sources, we computed the time-frequency decompositions for all 45000  
828 elementary dipoles and summed the power for the three orientations at each source location  
829 (or vertex) as recommended. Finally, power was averaged within the time window of the  
830 cluster and then averaged across trials separately for each studied experimental condition.  
831 This procedure was repeated for each participant, and the obtained cortical current power  
832 maps were averaged across participants in each condition. Then, we contrasted the maps  
833 between conditions (Distant minus Close conditions or Eurêka minus no Eurêka conditions)  
834 according to the considered cluster. We did not run further statistical analysis at the source  
835 level to avoid double-dipping. The cortical current power maps were thresholded to visualize  
836 only sources with activity higher and lower than 10% of the absolute maximal source.  
837

838

### 839 **Conflict of interest**

840

841 The authors declare no conflict of interest.

842

843

### 844 **Acknowledgements**

845

846 We thank all the participants to the study. EV and TB are funded by the 'Agence Nationale de  
847 la Recherche' [grant numbers ANR-19-CE37-001-01], the 'Fondation pour la recherche  
848 medicale' [grant number DEQ20150331725]. The research also received funding from the  
849 program 'Investissements d'avenir' ANR-10- IAIHU-06. MOT is funded by Becas-Chile of ANID  
850 (CONICYT). TB is funded by 'Société Française de neurologie' and AP-HP. NG and LH are funded  
851 by the program "Investissements d'avenir" (Agence Nationale de la Recherche, grant numbers  
852 ANR-10-IAIHU-06 and ANR-11-INBS-006) for infrastructure funding. BG received grant number  
853 from the 'Fondation pour la recherche médicale' [FDM20150632801].  
854

855

856

### 856 **Authors'contribution**

857

858 Conceptualization: EV and TB; Methodology: TB, MOT, BG, LH, NG, KL and RL; Data  
859 acquirement: TB, MOT and BG; Analyses: TB, ALP, NG and KL; Supervision: EV and NG; Writing:  
860 TB, EV and NG.  
861

862

863

### 863 **Data availability**

864

865 The material and the data sets generated during and/or analyzed during the current study are  
866 available from the corresponding author (TB) on reasonable request.  
867

868

869

### 869 **References**

870

871 Aberg, K. C., Doell, K. C., & Schwartz, S. (2016). The "Creative Right Brain" Revisited :



872 Individual Creativity and Associative Priming in the Right Hemisphere Relate to Hemispheric  
873 Asymmetries in Reward Brain Function. *Cerebral Cortex*.  
874 <https://doi.org/10.1093/cercor/bhw288>  
875 Adelhöfer, N., & Beste, C. (2020). Pre-trial theta band activity in the ventromedial prefrontal  
876 cortex correlates with inhibition-related theta band activity in the right inferior frontal cortex.  
877 *NeuroImage*, 117052. <https://doi.org/10.1016/j.neuroimage.2020.117052>  
878 Aichelburg, C., Urbanski, M., Thiebaut de Schotten, M., Humbert, F., Levy, R., & Volle, E.  
879 (2016). Morphometry of Left Frontal and Temporal Poles Predicts Analogical Reasoning  
880 Abilities. *Cerebral Cortex (New York, N.Y.: 1991)*, 26(3), 915-932.  
881 <https://doi.org/10.1093/cercor/bhu254>  
882 Anderson, J. R., Anderson, J. F., Ferris, J. L., Fincham, J. M., & Jung, K.-J. (2009). Lateral  
883 inferior prefrontal cortex and anterior cingulate cortex are engaged at different stages in the  
884 solution of insight problems. *Proceedings of the National Academy of Sciences of the United*  
885 *States of America*, 106(26), 10799-10804. <https://doi.org/10.1073/pnas.0903953106>  
886 Andrews-Hanna, J. R., Reidler, J. S., Huang, C., & Buckner, R. L. (2010). Evidence for the  
887 Default Network's Role in Spontaneous Cognition. *Journal of Neurophysiology*, 104(1),  
888 322-335. <https://doi.org/10.1152/jn.00830.2009>  
889 Andrews-Hanna, J. R., Smallwood, J., & Spreng, R. N. (2014). The default network and self-  
890 generated thought : Component processes, dynamic control, and clinical relevance: The brain's  
891 default network. *Annals of the New York Academy of Sciences*, 1316(1), 29-52.  
892 <https://doi.org/10.1111/nyas.12360>  
893 Aziz-Zadeh, L., Kaplan, J. T., & Iacoboni, M. (2009). « Aha! » : The neural correlates of verbal  
894 insight solutions. *Human Brain Mapping*, 30(3), 908-916. <https://doi.org/10.1002/hbm.20554>  
895 Backus, A. R., Schoffelen, J.-M., Szebényi, S., Hanslmayr, S., & Doeller, C. F. (2016).  
896 Hippocampal-prefrontal theta oscillations support memory integration. *Current Biology*, 26(4),  
897 450-457.  
898 Beaty, R. E., Benedek, M., Silvia, P. J., & Schacter, D. L. (2016). Creative Cognition and Brain  
899 Network Dynamics. *Trends in Cognitive Sciences*, 20(2), 87-95.  
900 <https://doi.org/10.1016/j.tics.2015.10.004>  
901 Beaty, R. E., Christensen, A. P., Benedek, M., Silvia, P. J., & Schacter, D. L. (2017). Creative  
902 constraints : Brain activity and network dynamics underlying semantic interference during idea  
903 production. *NeuroImage*, 148, 189-196. <https://doi.org/10.1016/j.neuroimage.2017.01.012>  
904 Becker, M., & Cabeza, R. (2021). *Assessing creativity independently of language : A normed*  
905 *Language Independent Remote Associate Task (LI-RAT)*.  
906 Becker, M., Sommer, T., & Kühn, S. (2020). Verbal insight revisited : FMRI evidence for early  
907 processing in bilateral insulae for solutions with AHA! experience shortly after trial onset.  
908 *Human Brain Mapping*, 41(1), 30-45. <https://doi.org/10.1002/hbm.24785>  
909 Bendetowicz, D., Urbanski, M., Aichelburg, C., Levy, R., & Volle, E. (2017). Brain  
910 morphometry predicts individual creative potential and the ability to combine remote ideas.  
911 *Cortex*, 86, 216-229. <https://doi.org/10.1016/j.cortex.2016.10.021>  
912 Bendetowicz, D., Urbanski, M., Garcin, B., Foulon, C., Levy, R., Bréchemier, M.-L., Rosso,  
913 C., Thiebaut de Schotten, M., & Volle, E. (2018). Two critical brain networks for generation  
914 and combination of remote associations. *Brain*, 141(1), 217-233.  
915 <https://doi.org/10.1093/brain/awx294>  
916 Benedek, M., & Fink, A. (2019). Toward a neurocognitive framework of creative cognition :  
917 The role of memory, attention, and cognitive control. *Current Opinion in Behavioral Sciences*,  
918 27, 116-122. <https://doi.org/10.1016/j.cobeha.2018.11.002>  
919 Benedek, M., & Jauk, E. (2018). Spontaneous and Controlled Processes in Creative Cognition.  
920 *The Oxford Handbook of Spontaneous Thought*.  
921 <https://doi.org/10.1093/oxfordhb/9780190464745.013.22>

922 Binder, J. R., Desai, R. H., Graves, W. W., & Conant, L. L. (2009). Where Is the Semantic  
923 System? A Critical Review and Meta-Analysis of 120 Functional Neuroimaging Studies.  
924 *Cerebral Cortex*, *19*(12), 2767-2796. <https://doi.org/10.1093/cercor/bhp055>

925 Bowden, E. M., & Jung-Beeman, M. (2003). Normative data for 144 compound remote  
926 associate problems. *Behavior Research Methods, Instruments, & Computers: A Journal of the*  
927 *Psychonomic Society, Inc*, *35*(4), 634-639.

928 Bowden, E. M., Jung-Beeman, M., Fleck, J., & Kounios, J. (2005). New approaches to  
929 demystifying insight. *Trends in Cognitive Sciences*, *9*(7), 322-328.  
930 <https://doi.org/10.1016/j.tics.2005.05.012>

931 Cassotti, M., Agogu e, M., Camarda, A., Houd e, O., & Borst, G. (2016). Inhibitory Control as  
932 a Core Process of Creative Problem Solving and Idea Generation from Childhood to  
933 Adulthood : Inhibitory Control as a Core Process of Creative Problem Solving. *New Directions*  
934 *for Child and Adolescent Development*, *2016*(151), 61-72. <https://doi.org/10.1002/cad.20153>

935 Cavanagh, J. F., & Frank, M. J. (2014). Frontal theta as a mechanism for cognitive control.  
936 *Trends in cognitive sciences*, *18*(8), 414-421.

937 Cavanagh, J. F., Zambrano-Vazquez, L., & Allen, J. J. (2012). Theta lingua franca : A common  
938 mid-frontal substrate for action monitoring processes. *Psychophysiology*, *49*(2), 220-238.

939 Cona, G., Chiossi, F., Di Tomasso, S., Pellegrino, G., Piccione, F., Bisiacchi, P., & Arcara, G.  
940 (2020). Theta and alpha oscillations as signatures of internal and external attention to delayed  
941 intentions : A magnetoencephalography (MEG) study. *NeuroImage*, *205*, 116295.

942 Cooper, N. R., Burgess, A. P., Croft, R. J., & Gruzelier, J. H. (2006). Investigating evoked and  
943 induced electroencephalogram activity in task-related alpha power increases during an  
944 internally directed attention task. *Neuroreport*, *17*(2), 205-208.

945 Danko, S. G., Shemyakina, N. V., Nagornova, Zh. V., & Starchenko, M. G. (2009). Comparison  
946 of the effects of the subjective complexity and verbal creativity on EEG spectral power  
947 parameters. *Human Physiology*, *35*(3), 381-383. <https://doi.org/10.1134/S0362119709030153>

948 da Silva, F. L. (2009). EEG : Origin and Measurement. In C. Mulert & L. Lemieux ( ds.), *EEG*  
949 *- fMRI* (p. 19-38). Springer Berlin Heidelberg. [http://link.springer.com/10.1007/978-3-540-](http://link.springer.com/10.1007/978-3-540-87919-0_2)  
950 [87919-0\\_2](http://link.springer.com/10.1007/978-3-540-87919-0_2)

951 Debrenne, M. (2011). Le dictionnaire des associations verbales du fran ais et ses applications.  
952 *Vari et s, variations and formes du fran ais*. Palaiseau:  ditions de l' cole polytechnique,  
953 355-366.

954 Dietrich, A., & Kanso, R. (2010). A review of EEG, ERP, and neuroimaging studies of  
955 creativity and insight. *Psychological Bulletin*, *136*(5), 822-848.  
956 <https://doi.org/10.1037/a0019749>

957 Domic-Siede, M., Irani, M., Vald es, J., Perrone-Bertolotti, M., & Ossand on, T. (2020). Theta  
958 Activity from Frontopolar Cortex, mid-Cingulate Cortex and Anterior Cingulate Cortex Shows  
959 Different Role in Cognitive Planning Performance. *NeuroImage*, 117557.  
960 <https://doi.org/10.1016/j.neuroimage.2020.117557>

961 D uzel, E., Penny, W. D., & Burgess, N. (2010). Brain oscillations and memory. *Current opinion*  
962 *in neurobiology*, *20*(2), 143-149.

963 Engel, A. K., & Fries, P. (2010). Beta-band oscillations—Signalling the status quo? *Current*  
964 *Opinion in Neurobiology*, *20*(2), 156-165. <https://doi.org/10.1016/j.conb.2010.02.015>

965 Engel, A. K., Fries, P., & Singer, W. (2001). Dynamic predictions : Oscillations and synchrony  
966 in top-down processing. *Nature Reviews Neuroscience*, *2*(10), 704-716.

967 Engel, A. K., & Singer, W. (2001). Temporal binding and the neural correlates of sensory  
968 awareness. *Trends in cognitive sciences*, *5*(1), 16-25.

969 Evans, M., Krieger-Redwood, K., Gonzalez Alam, T. R.J., Smallwood, J., & Jefferies, E. (2020).  
970 Controlled semantic summation correlates with intrinsic connectivity between default mode  
971 and control networks. *Cortex*, *129*, 356-375. <https://doi.org/10.1016/j.cortex.2020.04.032>

972 Fink, A., & Benedek, M. (2014). EEG alpha power and creative ideation. *Neuroscience &*  
973 *Biobehavioral Reviews*, *44*, 111-123. <https://doi.org/10.1016/j.neubiorev.2012.12.002>

974 Fink, A., Grabner, R. H., Benedek, M., Reishofer, G., Hauswirth, V., Fally, M., Neuper, C.,  
975 Ebner, F., & Neubauer, A. C. (2009). The creative brain : Investigation of brain activity during  
976 creative problem solving by means of EEG and fMRI. *Human Brain Mapping*, *30*(3), 734-748.  
977 <https://doi.org/10.1002/hbm.20538>

978 Fink, A., & Neubauer, A. C. (2006). EEG alpha oscillations during the performance of verbal  
979 creativity tasks : Differential effects of sex and verbal intelligence. *International Journal of*  
980 *Psychophysiology: Official Journal of the International Organization of Psychophysiology*,  
981 *62*(1), 46-53. <https://doi.org/10.1016/j.ijpsycho.2006.01.001>

982 Folstein, M. F., Folstein, S. E., & McHugh, P. R. (1975). “Mini-mental state” : A practical  
983 method for grading the cognitive state of patients for the clinician. *Journal of psychiatric*  
984 *research*, *12*(3), 189-198.

985 Gonen-Yaacovi, G., de Souza, L. C., Levy, R., Urbanski, M., Josse, G., & Volle, E. (2013).  
986 Rostral and caudal prefrontal contribution to creativity : A meta-analysis of functional imaging  
987 data. *Frontiers in Human Neuroscience*, *7*, 465. <https://doi.org/10.3389/fnhum.2013.00465>

988 Gonzalez Alam, T. R. del J., Karapanagiotidis, T., Smallwood, J., & Jefferies, E. (2019).  
989 Degrees of lateralisation in semantic cognition: Evidence from intrinsic connectivity.  
990 *NeuroImage*, *202*, 116089. <https://doi.org/10.1016/j.neuroimage.2019.116089>

991 Gramfort, A., Papadopoulos, T., Olivi, E., & Clerc, M. (2010). *An empirical evaluation of free*  
992 *BEM solvers for M/EEG forward modeling*. *Biomag*.

993 Green, A. E., Spiegel, K. A., Giangrande, E. J., Weinberger, A. B., Gallagher, N. M., &  
994 Turkeltaub, P. E. (2016). Thinking Cap Plus Thinking Zap : TDCS of Frontopolar Cortex  
995 Improves Creative Analogical Reasoning and Facilitates Conscious Augmentation of State  
996 Creativity in Verb Generation. *Cerebral Cortex*, bhw080.  
997 <https://doi.org/10.1093/cercor/bhw080>

998 Hickok, G., & Poeppel, D. (2004). Dorsal and ventral streams : A framework for understanding  
999 aspects of the functional anatomy of language. *Cognition*, *92*(1-2), 67-99.

1000 Jauk, E., Benedek, M., & Neubauer, A. C. (2012). Tackling creativity at its roots : Evidence for  
1001 different patterns of EEG alpha activity related to convergent and divergent modes of task  
1002 processing. *International Journal of Psychophysiology*, *84*(2), 219-225.  
1003 <https://doi.org/10.1016/j.ijpsycho.2012.02.012>

1004 Jefferies, E., & Wang, X. (2021). Semantic Cognition : Semantic Memory and Semantic  
1005 Control. In *Oxford Research Encyclopedia of Psychology*.

1006 Jones, L. L., & Estes, Z. (2015). Convergent and divergent thinking in verbal analogy. *Thinking*  
1007 *& Reasoning*, *21*(4), 473-500. <https://doi.org/10.1080/13546783.2015.1036120>

1008 Jung-Beeman, M., Bowden, E. M., Haberman, J., Frymiare, J. L., Arambel-Liu, S., Greenblatt,  
1009 R., Reber, P. J., & Kounios, J. (2004). Neural activity when people solve verbal problems with  
1010 insight. *PLoS Biology*, *2*(4), E97. <https://doi.org/10.1371/journal.pbio.0020097>

1011 Klimesch, W. (2012). Alpha-band oscillations, attention, and controlled access to stored  
1012 information. *Trends in Cognitive Sciences*, *16*(12), 606-617.  
1013 <https://doi.org/10.1016/j.tics.2012.10.007>

1014 Klimesch, W., Sauseng, P., & Hanslmayr, S. (2007). EEG alpha oscillations : The inhibition-  
1015 timing hypothesis. *Brain Research Reviews*, *53*(1), 63-88.  
1016 <https://doi.org/10.1016/j.brainresrev.2006.06.003>

1017 Kounios, J., & Beeman, M. (2014). The cognitive neuroscience of insight. *Annual Review of*  
1018 *Psychology*, *65*, 71-93. <https://doi.org/10.1146/annurev-psych-010213-115154>

1019 Laukkonen, R. E., & Tangen, J. M. (2018). How to detect insight moments in problem solving  
1020 experiments. *Frontiers in psychology*, *9*, 282.

1021 Lin, J., Cui, X., Dai, X., Chen, Y., & Mo, L. (2018). Neural correlates of creative insight :

1022 Amplitude of low-frequency fluctuation of resting-state brain activity predicts creative insight.  
1023 *PloS one*, 13(8), e0203071.

1024 Luft, C. D. B., Zioga, I., Thompson, N. M., Banissy, M. J., & Bhattacharya, J. (2018). Right  
1025 temporal alpha oscillations as a neural mechanism for inhibiting obvious associations.  
1026 *Proceedings of the National Academy of Sciences*, 115(52), E12144-E12152.

1027 Luo, J., & Niki, K. (2003). Function of hippocampus in “insight” of problem solving.  
1028 *Hippocampus*, 13(3), 316-323.

1029 Lustenberger, C., Boyle, M. R., Foulser, A. A., Mellin, J. M., & Fröhlich, F. (2015). Functional  
1030 role of frontal alpha oscillations in creativity. *Cortex*, 67, 74-82.  
1031 <https://doi.org/10.1016/j.cortex.2015.03.012>

1032 Mastria, S., Agnoli, S., Zanon, M., Acar, S., Runco, M. A., & Corazza, G. E. (2021). Clustering  
1033 and switching in divergent thinking: Neurophysiological correlates underlying flexibility  
1034 during idea generation. *Neuropsychologia*, 158, 107890.

1035 Matheson, H. E., & Kenett, Y. N. (2020). The role of the motor system in generating creative  
1036 thoughts. *NeuroImage*, 213, 116697. <https://doi.org/10.1016/j.neuroimage.2020.116697>

1037 Mednick, S. A. (1962). The associative basis of the creative process. *Psychological Review*, 69,  
1038 220-232.

1039 Mölle, M., Marshall, L., Lutzenberger, W., Pietrowsky, R., Fehm, H. L., & Born, J. (1996).  
1040 Enhanced dynamic complexity in the human EEG during creative thinking. *Neuroscience*  
1041 *Letters*, 208(1), 61-64.

1042 Nicolás, B., Sala-Padró, J., Cucurell, D., Santurino, M., Falip, M., & Fuentemilla, L. (2021).  
1043 Theta rhythm supports hippocampus-dependent integrative encoding in schematic/semantic  
1044 memory networks. *NeuroImage*, 226, 117558.

1045 Noonan, K. A., Jefferies, E., Visser, M., & Lambon Ralph, M. A. (2013). Going beyond inferior  
1046 prefrontal involvement in semantic control: Evidence for the additional contribution of dorsal  
1047 angular gyrus and posterior middle temporal cortex. *Journal of cognitive neuroscience*, 25(11),  
1048 1824-1850.

1049 Oh, Y., Chesebrough, C., Erickson, B., Zhang, F., & Kounios, J. (2020). An insight-related  
1050 neural reward signal. *NeuroImage*, 214, 116757.

1051 Ohlsson, S. (1992). Information-processing explanations of insight and related phenomena.  
1052 *Advances in the psychology of thinking*, 1, 1-44.

1053 Oltețeanu, A.-M., Schöttner, M., & Schubert, S. (2019). Computationally resurrecting the  
1054 functional remote associates test using cognitive word associates and principles from a  
1055 computational solver. *Knowledge-Based Systems*, 168, 1-9.

1056 Oltețeanu, A.-M., & Zunjani, F. H. (2020). A visual remote associates test and its validation.  
1057 *Frontiers in psychology*, 11, 26.

1058 Oostenveld, R., Fries, P., Maris, E., & Schoffelen, J.-M. (2011). FieldTrip: Open Source  
1059 Software for Advanced Analysis of MEG, EEG, and Invasive Electrophysiological Data.  
1060 *Computational Intelligence and Neuroscience*, 2011, 1-9. <https://doi.org/10.1155/2011/156869>

1061 Power, J. D., & Petersen, S. E. (2013). Control-related systems in the human brain. *Current*  
1062 *Opinion in Neurobiology*, 23(2), 223-228. <https://doi.org/10.1016/j.conb.2012.12.009>

1063 Qiu, J., Li, H., Jou, J., Liu, J., Luo, Y., Feng, T., Wu, Z., & Zhang, Q. (2010). Neural correlates  
1064 of the “Aha” experiences: Evidence from an fMRI study of insight problem solving. *cortex*,  
1065 46(3), 397-403.

1066 Ralph, M. A. L., Jefferies, E., Patterson, K., & Rogers, T. T. (2017). The neural and  
1067 computational bases of semantic cognition. *Nature Reviews Neuroscience*, 18(1), 42-55.

1068 Razumnikova, O. M. (2007). Creativity related cortex activity in the remote associates task.  
1069 *Brain Res Bull*, 73(1-3), 96-102.

1070 Riddle, J., Scimeca, J. M., Cellier, D., Dhanani, S., & D’Esposito, M. (2020). Causal evidence  
1071 for a role of theta and alpha oscillations in the control of working memory. *Current Biology*,

1072 30(9), 1748-1754.

1073 Rosen, A., & Reiner, M. (2016). Right frontal gamma and beta band enhancement while solving  
1074 a spatial puzzle with insight. *International Journal of Psychophysiology*.  
1075 <https://doi.org/10.1016/j.ijpsycho.2016.09.008>

1076 Sadaghiani, S., & Kleinschmidt, A. (2016). Brain networks and  $\alpha$ -oscillations : Structural and  
1077 functional foundations of cognitive control. *Trends in cognitive sciences*, 20(11), 805-817.

1078 Sandkühler, S., & Bhattacharya, J. (2008). Deconstructing Insight: EEG Correlates of  
1079 Insightful Problem Solving. *PLOS ONE*, 3(1), e1459.  
1080 <https://doi.org/10.1371/journal.pone.0001459>

1081 Shemyakina, N. V., Danko, S. G., Nagornova, Zh. V., Starchenko, M. G., & Bechtereva, N. P.  
1082 (2007). Changes in the power and coherence spectra of the EEG rhythmic components during  
1083 solution of a verbal creative task of overcoming a stereotype. *Human Physiology*, 33(5),  
1084 524-530. <https://doi.org/10.1134/S0362119707050027>

1085 Shen, W., Yuan, Y., Liu, C., Zhang, X., Luo, J., & Gong, Z. (2016). Is creative insight task-  
1086 specific? A coordinate-based meta-analysis of neuroimaging studies on insightful problem  
1087 solving. *International Journal of Psychophysiology*, 110, 81-90.

1088 Sheth, B. R., Sandkühler, S., & Bhattacharya, J. (2009). Posterior Beta and anterior gamma  
1089 oscillations predict cognitive insight. *Journal of Cognitive Neuroscience*, 21(7), 1269-1279.  
1090 <https://doi.org/10.1162/jocn.2009.21069>

1091 Sprugnoli, G., Rossi, S., Emmendorfer, A., Rossi, A., Liew, S.-L., Tatti, E., di Lorenzo, G.,  
1092 Pascual-Leone, A., & Santarnecchi, E. (2017). Neural correlates of Eureka moment.  
1093 *Intelligence*, 62, 99-118. <https://doi.org/10.1016/j.intell.2017.03.004>

1094 Subramaniam, K., Kounios, J., Parrish, T. B., & Jung-Beeman, M. (2009). A brain mechanism  
1095 for facilitation of insight by positive affect. *Journal of Cognitive Neuroscience*, 21(3), 415-432.  
1096 <https://doi.org/10.1162/jocn.2009.21057>

1097 Tadel, F., Baillet, S., Mosher, J. C., Pantazis, D., & Leahy, R. M. (2011). Brainstorm : A user-  
1098 friendly application for MEG/EEG analysis. *Computational intelligence and neuroscience*,  
1099 2011.

1100 Tallon-Baudry, C., Kreiter, A., & Bertrand, O. (1999). Sustained and transient oscillatory  
1101 responses in the gamma and beta bands in a visual short-term memory task in humans. *Visual*  
1102 *Neuroscience*, 16(3), 449-459.

1103 Teige, C., Cornelissen, P. L., Mollo, G., Gonzalez Alam, T. R. del J., McCarty, K., Smallwood,  
1104 J., & Jefferies, E. (2019). Dissociations in semantic cognition : Oscillatory evidence for  
1105 opposing effects of semantic control and type of semantic relation in anterior and posterior  
1106 temporal cortex. *Cortex*, 120, 308-325. <https://doi.org/10.1016/j.cortex.2019.07.002>

1107 Tik, M., Sladky, R., Luft, C. D. B., Willinger, D., Hoffmann, A., Banissy, M. J., Bhattacharya,  
1108 J., & Windischberger, C. (2018). Ultra-high-field fMRI insights on insight : Neural correlates  
1109 of the Aha!-moment. *Human brain mapping*, 39(8), 3241-3252.

1110 Topolinski, S., & Reber, R. (2010). Gaining Insight Into the “Aha” Experience. *Current*  
1111 *Directions in Psychological Science*, 19(6), 402-405.  
1112 <https://doi.org/10.1177/0963721410388803>

1113 Urbanski, M., Bréchemier, M.-L., Garcin, B., Bendetowicz, D., Thiebaut de Schotten, M.,  
1114 Foulon, C., Rosso, C., Clarençon, F., Dupont, S., Pradat-Diehl, P., Labeyrie, M.-A., Levy, R.,  
1115 & Volle, E. (2016). Reasoning by analogy requires the left frontal pole : Lesion-deficit mapping  
1116 and clinical implications. *Brain*, 139(6), 1783-1799. <https://doi.org/10.1093/brain/aww072>

1117 Vatansever, D., Smallwood, J., & Jefferies, E. (2021). Varying demands for cognitive control  
1118 reveals shared neural processes supporting semantic and episodic memory retrieval. *Nature*  
1119 *communications*, 12(1), 1-11.

1120 Visser, M., Jefferies, E., Embleton, K. V., & Lambon Ralph, M. A. (2012). Both the middle  
1121 temporal gyrus and the ventral anterior temporal area are crucial for multimodal semantic

1122 processing: Distortion-corrected fMRI evidence for a double gradient of information  
1123 convergence in the temporal lobes. *Journal of Cognitive Neuroscience*, 24(8), 1766-1778.

1124 Volle, E. (2017). Associative and controlled cognition in divergent thinking: Theoretical,  
1125 experimental, neuroimaging evidence, and new directions. In *The Cambridge Handbook of the*  
1126 *Neuroscience of Creativity* (Cambridge University Press). Editors: R.E. Jung and O. Vartanian.

1127 Wallas, G. (1926). *The art of thought*.

1128 Weisberg, R. W. (2013). On the “Demystification” of Insight: A Critique of Neuroimaging  
1129 Studies of Insight. *Creativity Research Journal*, 25(1), 1-14.  
1130 <https://doi.org/10.1080/10400419.2013.752178>

1131 Weiss, S., & Mueller, H. M. (2012). “Too Many betas do not Spoil the Broth”: The Role of  
1132 Beta Brain Oscillations in Language Processing. *Frontiers in Psychology*, 3.  
1133 <https://doi.org/10.3389/fpsyg.2012.00201>

1134 Whitney, C., Jefferies, E., & Kircher, T. (2011). Heterogeneity of the left temporal lobe in  
1135 semantic representation and control: Priming multiple versus single meanings of ambiguous  
1136 words. *Cerebral cortex*, 21(4), 831-844.

1137 Williams, C. C., Kappen, M., Hassall, C. D., Wright, B., & Krigolson, O. E. (2019). Thinking  
1138 theta and alpha: Mechanisms of intuitive and analytical reasoning. *NeuroImage*, 189, 574-580.  
1139 <https://doi.org/10.1016/j.neuroimage.2019.01.048>

1140 Wu, C.-L., Huang, S.-Y., Chen, P.-Z., & Chen, H.-C. (2020). A Systematic Review of  
1141 Creativity-Related Studies Applying the Remote Associates Test From 2000 to 2019. *Frontiers*  
1142 *in Psychology*, 11. <https://doi.org/10.3389/fpsyg.2020.573432>

1143 Yeo, B. T. T., Krienen, F. M., Sepulcre, J., Sabuncu, M. R., Lashkari, D., Hollinshead, M.,  
1144 Roffman, J. L., Smoller, J. W., Zöllei, L., Polimeni, J. R., Fischl, B., Liu, H., & Buckner, R. L.  
1145 (2011). The organization of the human cerebral cortex estimated by intrinsic functional  
1146 connectivity. *Journal of Neurophysiology*, 106(3), 1125-1165.  
1147 <https://doi.org/10.1152/jn.00338.2011>

1148 Zavala, B., Jang, A., Trotta, M., Lungu, C. I., Brown, P., & Zaghoul, K. A. (2018). Cognitive  
1149 control involves theta power within trials and beta power across trials in the prefrontal-  
1150 subthalamic network. *Brain*, 141(12), 3361-3376.

1151 Zhou, S., Chen, S., Wang, S., Zhao, Q., Zhou, Z., & Lu, C. (2018). Temporal and spatial patterns  
1152 of neural activity associated with information selection in open-ended creativity. *Neuroscience*,  
1153 371, 268-276.

1154 Zioga, I., Harrison, P. M. C., Pearce, M. T., Bhattacharya, J., & Di Bernardi Luft, C. (2020).  
1155 From learning to creativity: Identifying the behavioural and neural correlates of learning to  
1156 predict human judgements of musical creativity. *NeuroImage*, 206, 116311.  
1157 <https://doi.org/10.1016/j.neuroimage.2019.116311>

1158
